1  
2  
3  
4  
5  
6  
7  
8  
9  
10  
11  
12  
13  
14  
15  
16  
17  
18  
19  
20  
21  
22  
23  
24  
25  
26  
27

## Odor source localization in complex visual environments by fruit flies

Nitesh Saxena<sup>1,†</sup>, Dinesh Natesan<sup>1,2,3,†</sup> and Sanjay P. Sane<sup>1,\*</sup>

<sup>1</sup>National Centre for Biological Sciences

Tata Institute of Fundamental Research

GKVK campus, Bellary road,

Bangalore 560065

INDIA

<sup>2</sup>Dept of Computational Science and Technology

School of Computer Science and Communication

KTH Royal Institute of Technology

Stockholm 10044

Sweden

<sup>3</sup>Manipal University

Manipal

576104

India

[\\*sane@ncbs.res.in](mailto:*sane@ncbs.res.in)

† Equal contribution

28  
29  
30  
31  
32  
33  
34  
35  
36  
37  
38  
39  
40  
41  
42  
43  
44  
45  
46  
47  
48  
49  
50  
51  
52  
53  
54  
55  
56  
57

## Abstract

Flying insects routinely forage in complex and cluttered sensory environments. Their search for a food or a pheromone source typically begins with a whiff of odor, which triggers a flight response, eventually bringing the insect in the vicinity of the odor source. The precise localization of an odor source, however, requires the use of both visual and olfactory modalities, aided by air currents that trap odor molecules into turbulent plumes, which the insects track. Here, we investigated odor tracking behavior in fruit flies (*Drosophila melanogaster*) presented with low- or high-contrast visual landmarks, which were either paired with or separate from an attractive odor cue. These experiments were conducted either in a gentle air stream which generated odor plumes, or in still air in which odor dissipates uniformly in all directions. The trajectories of the flies revealed several novel features of their odor-tracking behavior in addition to those that have been previously documented (e.g. cast-and-surge maneuvers). First, in both moving and still air, odor-seeking flies rely on the co-occurrence of visual landmarks with olfactory cues to guide them to putative odorant objects in the decisive phase before landing. Second, flies abruptly decelerate when they encounter an odor plume, and thereafter steer towards nearby visual objects that had no inherent salience in the absence of odor. This indicates that the interception of an attractive odor increases their salience to nearby high-contrast visual landmarks. Third, flies adopt distinct odor tracking strategies during flight in moving vs. still air. Whereas they weave in and out of plumes towards an odor source when airflow is present, their approach is more gradual and incremental in still air. Both strategies are robust and flexible, and can ensure that the flies reliably find the odor source under diverse visual and airflow environments. Our experiments also indicate the possibility of an olfactory “working memory” that enables flies to continue their search even when the olfactory feedback is reduced or absent. Together, these results provide insights into how flies determine the precise location of an odor source.

58

## Introduction

59 Freely-flying insects live in a complex world that is both visually heterogeneous and odor-  
60 rich. This poses steep challenges in locating specific sources of odor which may include  
61 conspecific mates, food sources or oviposition sites. Moreover, these resources are often  
62 camouflaged in their natural surroundings or lack the distinctive visual features that identify  
63 them as putative odor sources. For insects flying in natural conditions, this task is confounded  
64 by the fact that flow conditions are turbulent and airflow can unpredictably change direction,  
65 which means that instantaneous odor signals may not provide reliable information about the  
66 location of an odorous object (Murlis, 1992; Vickers, 2000). Rather than diffusing along a  
67 smooth concentration gradient, odor signals in breezy conditions propagate as intermittent,  
68 filamentous plumes interspersed with clean air packets that greatly increase the range over  
69 which the odor molecules travel (Murlis, 1992; Willis et al., 1994). In hovering or slow-  
70 flying insects, these plumes are more laminar but disturbed by wing-induced upwind  
71 turbulence. This enhances odor sampling, but also alters spatial information about the  
72 location of an odor source (Sane and Jacobson, 2006).

73 It is well-known that airflow cues play a critical role in orienting flying insects toward an  
74 odor source (e.g. Kennedy and Marsh, 1974). Airflow collimates the odor cues thereby  
75 providing important directional cues to the odor-tracking insect. For instance, during active  
76 plume-tracking in laminar airflow, insects fly upwind aligning with the odor plume. Such  
77 behavior typically consists of two key aerial maneuvers. First, upon encountering an odor  
78 plume, insects perform *surging* maneuvers, which involve flying forward in the direction of  
79 the upwind odor source. However, if they lose track of the plume, they *cast* orthogonally to  
80 the plume axis to regain contact with the odor packets. The combination of casting-and-  
81 surging naturally channels the insect towards the source of odor (Farkas and Shorey, 1972;  
82 Kennedy, 1983; Vickers and Baker, 1994; Vickers, 2000).

83 For the *cast-and-surge* strategy to be effective, airflow must be relatively uniform and  
84 laminar. However, under most natural conditions, airflow can be quite erratic which means  
85 insects require supplementary information from other sensory modalities, especially vision.  
86 For example, fruit flies rely on wide-field visual cues during odor tracking (Frye et al., 2003;  
87 Budick and Dickinson, 2006; Duistermars and Frye, 2008), and moths utilize ambient visual  
88 cues to estimate airflow direction (e.g. Kennedy and Marsh, 1974). The sensing and  
89 processing by one sensory modality is often influenced by feedback from another modality

90 during active behaviors. In odor tracking fruit flies, the presence of odor cues can modify  
91 optomotor responses thus enhancing their chances of honing in on visual features while  
92 maintaining a constant heading (Chow and Frye, 2008).

93 As they approach an odor source, insects rely on local visual cues to find odor objects  
94 (Raguso and Willis, 2002). Indeed, visual landmarks become attractive to insects *only* if odor  
95 is present (e.g. fruit flies, van Breugel and Dickinson, 2014; mosquitoes, van Breugel and  
96 Dickinson et al., 2015). However, if visual cues are indistinct or ambiguous, flies may  
97 increase their reliance on odor cues to find the sources of odor (e.g. in the Tephritid apple fly  
98 *Rhagoletis pomonella* (Walsh); Aluja and Prokopy, 1993). Under tethered conditions, local  
99 visual landmarks by themselves appear insufficient to help orient flies toward odor plumes,  
100 and may require wide-field visual cues such as panoramic background from the surroundings  
101 to navigate to the odor source (Duistermars and Frye, 2008).

102 Although the above studies demonstrate the importance of combining olfactory, airflow and  
103 visual cues in guiding insects to the general vicinity of an odor source, they do not reveal how  
104 they pinpoint the precise location of an odor source within complex visual environments.  
105 Here, we conducted experiments to test the hypothesis that local landmarks are essential in  
106 guiding flies to an odor source in the final stages before making a decision to land. Such a  
107 strategy is especially necessary in the relative absence of ambient airflow in which odor  
108 gradient tracking followed by guidance *via* local landmarks can provide an additional  
109 reference to locate odor objects. Our broad approach involved presenting simultaneous but  
110 spatially-staggered visual and odor cues to compel the flies to choose between them, in both  
111 the presence and absence of laminar airflow. Using high-speed videographic reconstructions  
112 of their 3D flight trajectories at high spatial resolution, we deconstructed how the combined  
113 odor and visual stimuli influenced the trajectories of flies prior to landing. Our data provide  
114 few simple rules used by flies to pinpoint the location of an odor source.

## 115 **Materials and Methods**

116 We used 2-3 days old Canton-S flies from a culture maintained at the National Centre for  
117 Biological Sciences campus in Bangalore. Fly stocks were maintained at room temperature  
118 between 24-27°C, and in a 12 hr: 12 hr light-dark cycle. Prior to the experimental trials, the  
119 flies were starved overnight for ~12 hours to increase their motivation for foraging. They

120 were provided with water soaked paper during starvation period to prevent dehydration.

121 Experiments were conducted during flies' photoperiod to ensure robust flight activity.

122 *Visual cues:* We used two objects with different visual contrast that acted as low- or high-  
123 contrast visual landmarks for the flies.

124 *Low-contrast landmark:* A transparent glass capillary (length = 100 mm, diameter = 1 mm)  
125 placed within a small Plexiglas® holder tipped with cotton ball constituted the low-contrast  
126 visual landmark.

127 *High-contrast landmark:* We threaded a black spherical bead (diameter = 6 mm) on the glass  
128 capillary described above. The bead subtended an angle of  $\sim 5^\circ$  on the fly retina at a distance  
129 of  $\sim 80$  mm from the bead (our region of interest), and constituted a high-contrast local visual  
130 landmark for the approaching flies.

131 *Odororous landmarks:* Odor cues consisted of 10  $\mu$ l of apple cider vinegar (5% vinegar syrup,  
132 Zeta Food Products, Stockholm), placed on the black bead (*high-contrast odororous landmark*)  
133 or cotton tip of the capillary (*low-contrast odororous landmark*) depending on the experimental  
134 treatment.

135 *Wind tunnel and filming apparatus:* We used a custom-made, calibrated low-flow wind  
136 tunnel to generate laminar airflow for experiments conducted in the presence of airflow. Flies  
137 were released in the test chamber (1200 mm X 280 mm X 280 mm), within which odor and  
138 visual cues were placed (Fig. 1A). For experiments involving the presence of airflow, the  
139 value of laminar airflow within the test section was set to 0.1 m/s, which is within the range  
140 of naturally-occurring airflow values. Air speed was measured using a hot-wire anemometer  
141 (Kurz, 490-IS portable anemometer, Monterey, California, USA for details see Sane and  
142 Jacobson, 2006). For experiments conducted in still air, wind tunnel motor was switched off  
143 and both ends of the wind tunnel were sealed using Plexiglas® sheets, thereby reducing  
144 ambient flow to values that were too low to be measured by the anemometer. The odorous  
145 landmark was then placed within the still chamber and odor was allowed to diffuse for  $\sim 20$   
146 minutes. After this, flies were released inside the wind tunnel. To enhance the contrast  
147 between fly and the background, we lined the sides and base of the wind tunnel working  
148 section with white paper, which was then backlit by four 50 W halogen lamps to provide  
149 illumination for flies to track visual objects. A 150-watt metal halide lamp on top of the wind  
150 tunnel provided sufficient illumination for high-speed filming. We placed an additional red

151 filter on the 150 W lamp to ensure that we used illumination of only wavelengths above 610  
152 nm. Because fruit flies are relatively insensitive to light of wavelengths above 600 nm  
153 (Heisenberg and Wolf, 1984), we chose illumination of wavelengths above 610 nm for  
154 minimal impact on the flight behavior. The average illumination within the chamber was  
155 ~350 lux, measured using a light meter (Center 337, Center Technology Corporation, Taipei,  
156 Taiwan).

157 We filmed the flight trajectories at 100 frames per second using two high-speed cameras  
158 (Phantom v7.3 / Miro eX4, Vision Research, Wayne, New Jersey, USA) placed above the  
159 wind tunnel. We introduced approximately 5 or 6 flies inside the wind tunnel in every trial to  
160 reduce the waiting time for observing a landing event. Typically, only one fly approached the  
161 odor source at any given time and after first fly landed on any landmark, the trial was  
162 terminated. In rare cases, if multiple flies approached the odor source simultaneously, such  
163 trajectories were excluded to avoid the confounding effects of competitive social interactions  
164 between flies. Before starting another trial with a new set of flies, we flushed out flies from  
165 the previous trial from the wind tunnel to ensure that we recorded only the innate responses  
166 of naïve flies. One flight trajectory was filmed in each trial and 3D trajectories within 80 mm  
167 distance range from the odor source were analyzed.

#### 168 *Treatments*

169 We tested the responses of flies towards different arrangements of odor and visual cues. Each  
170 specific set of odor and visual cue arrangement constituted a *treatment*. All treatments and  
171 corresponding results are represented using icons and summarized in Table 1.

#### 172 *Experimental design*

173 In all, we conducted seven experiments in which naïve flies were required to identify the odor  
174 source in presence of visual landmarks. In the first set, the flies flew in the presence of a  
175 constant 0.1 m/s airflow (experiments 1-4) whereas a second set was conducted in still air  
176 (experiments 5-7). We systematically varied the arrangement of visual landmarks around a  
177 single odorous landmark. Each experiment contained multiple treatments, with a fixed  
178 combination of odor, visual and airflow conditions for which individual responses of flies  
179 were filmed over multiple trials. These experiments are described below.

#### 180 *Presence of airflow*

181 *Experiment 1: Responses to individual odor and visual cues, and their combination:*

182 Flies were flown under three conditions:

183 1) A single *high-contrast non-odorous landmark*, to observe the innate responses of flies  
184 towards a visual cue in absence of odor cues.

185 2) A single *high-contrast odorous landmark*, to observe flight responses towards combined  
186 visual and odor cues and,

187 3) A single *low-contrast odorous landmark*, to observe flight responses towards odor cues  
188 with the low-contrast visual cue, which was a glass capillary with cotton tip to facilitate  
189 landing of flies.

190 *Experiment 2: Responses to decoupling of odor and visual cues:* We decoupled the odor and  
191 visual cues such that the *high-contrast non-odorous landmark* was kept separate from the  
192 *low-contrast odorous landmark* by a distance of 1, 2 and 5 cm respectively. These three  
193 treatments were compared with single *low-contrast odorous landmark* from experiment 1.

194 *Experiment 3: Control:* As the control case for above experiment, we switched the positions  
195 of odorous and non-odorous landmarks, now keeping the *high-contrast odorous landmark*  
196 and *low-contrast non-odorous landmark* separated by 1, 2, and 5 cm respectively. These three  
197 treatments were compared with single *high-contrast odorous landmark* from experiment 1.

198 *Experiment 4: Odor source localization in visual clutter:* To determine how flies identify  
199 odor sources within visually cluttered environments, we varied the number and density of  
200 landmarks around the odor source.

201 Flies were flown under three conditions of visual clutter:

202 1) *High-density visual clutter of seven objects:* We arranged seven high-contrast  
203 landmarks each separated by 1 cm in a single row. Odor was contained in an off-  
204 center (fifth) landmark, to ensure that flies landing on objects was not an indirect  
205 consequence of the natural centering response displayed by many insects when flying  
206 through confined spaces (e.g. Srinivasan et al., 1996). Our experimental design forced  
207 the fly to actively break symmetry to find odor source, thereby avoiding bias toward  
208 the central landmark.

- 209 2) *Low-density visual clutter of seven objects*: Seven high-contrast landmarks were each  
210 separated by 3 cm with the fifth landmark from right (approaching upwind)  
211 containing odor;  
212
- 213 3) *Low-density low visual clutter of three objects*. Three high-contrast landmarks were  
214 arranged in a row, each separated from its nearest neighbor by 3 cm. Although the  
215 middle landmark was the odor object here, it was off-center.

## 216 ***Absence of airflow***

217 Airflow breaks the directional symmetry, and insects typically respond by flying in the  
218 upwind direction during odor tracking. In the absence of airflow, odor spreads primarily by  
219 diffusion in all directions. How do flies resolve the challenge of finding odor source in still  
220 air? We created the conditions required to address this question in Experiments 5-7.

221 *Experiment 5*: A single *low-contrast odorous landmark* was presented to the flies flying in  
222 the wind-tunnel with the fan switched off and wind tunnel sealed as previously described.

223 *Experiment 6*: We tested if flies were capable of distinguishing between two identical high-  
224 contrast landmarks of which only one was odorous, placed 1, 2 and 5 cm apart respectively.

225 *Experiment 7*: To determine the effect of visual contrast on odor tracking behavior in the  
226 absence of airflow, we designed two treatments. In one treatment, we placed a *low-contrast*  
227 *odorous landmark* separated by a *high-contrast non-odorous landmark* by 5 cm. As a control  
228 treatment, we placed *high-contrast odorous landmark* separated by a *low-contrast non-*  
229 *odorous landmark* by 5 cm.

230 The sample sizes and landing preferences of flies in the above treatments are provided in  
231 Table 1. These experiments allowed us to make systematic observations of landing  
232 preferences and perform the analysis of flight trajectories to explore the behavioral rules  
233 underlying odor tracking in fruit flies.

## 234 ***Quantification of airflow***

235 *Laminarity*: To ascertain the laminarity of the wind tunnel, we used two methods. First, we  
236 placed a hot-wire anemometer at separate points within the test section and verified that the  
237 value of airspeed at various points in space was identical, and at each point it held a constant  
238 value in time (see also Roy Khurana and Sane, 2016). Next, we determined laminarity for the



239 airflow conditions for various treatments, to ensure that the presence of objects within the  
240 wind tunnel did not introduce turbulence in the internal flows. From a theoretical perspective,  
241 such turbulence is unlikely for reasons outlined below. For an object of characteristic length  
242  $L$  placed in a fluid with velocity  $V$  and kinematic viscosity  $\nu$ , the Reynolds number ( $Re$ ) is  
243 given by:

$$244 \quad Re = \frac{VL}{\nu} \quad (1)$$

245 For airflow of 0.1 m/s, kinematic viscosity of  $1.57 \times 10^{-5} \text{ m}^2/\text{s}$  (dry air at 300 K) and  
246 characteristic lengths from 1 mm (single capillary) to 10 mm (smallest separation distance  
247 between two landmarks), the Reynolds numbers range from  $\sim 7$ -70, well within the laminar  
248 regime. We tested this expectation using flow visualization in the wind tunnel (see  
249 Supplementary video 1).

### 250 *Plume Visualization*

251 To visualize the odor plume, we seeded the flow with smoke generated using moldable  
252 incense clay, mimicking the odor source in our experiments. We simulated the following  
253 treatments, which encompassed the odor plume conditions in all experiments:

- 254 1. Capillary (i.e. low-contrast object).
- 255 2. Capillary generating smoke, with a spherical bead (6 mm diameter, i.e. high-contrast  
256 object) at 1 cm.
- 257 3. Capillary generating smoke, with a spherical bead at 2 cm.
- 258 4. Spherical bead.
- 259 5. Spherical bead generating smoke, flanked by two beads at 1 cm.

260

261 We filmed the smoke plume at 24 fps using a calibrated high-resolution high-speed camera  
262 (Phantom VEO 640L, Vision Research, Wayne, New Jersey, USA) which directly viewed the  
263 object from above. The wind tunnel was set at 0.1 m/s. For every smoke plume treatment, we  
264 filmed four trials saving a minimum of 100 frames per video, which were processed using  
265 Fiji (Schindelin et al., 2012) software. We recursively subtracted the background from each  
266 image in the stack to obtain the averaged steady-state image of the axisymmetric plume.  
267 Undetected gaps in the plume were interpolated using piecewise Cubic Hermite spline. By  
268 adjusting the threshold and filtering this image with a median filter to remove salt-and-pepper  
269 noise, we obtained a binary form of this image, which was imported into MATLAB and

270 digitized using a custom code (Supplementary Figure 1A-E). We obtained the plume width  
271 with respect to the source distance by pooling the data at a resolution of 1 mm  
272 (Supplementary figure 1-F). The plume width of the smoke plume saturated to become  
273 roughly cylindrical about 4-8 cm from the odor source. The presence of neighboring spherical  
274 beads only slightly affected the plume width, causing it to vary between 1-1.6 cm in diameter.  
275 For all calculations relating to odor encounters, we set 1.6 cm as the diameter of the plume.

#### 276 *Data Acquisition and Analysis*

277 Two cameras simultaneously recorded the fly's trajectory as it approached the odor source.  
278 The fly's position was digitally marked in each camera view and their 3D position  
279 reconstructed using custom MATLAB software (Hedrick, 2008). The extracted trajectories  
280 were processed through a 4<sup>th</sup> order Butterworth filter with a cut-off of 30 Hz. The *high-*  
281 *contrast landmark* used in this study subtended an angle of  $\sim 5^\circ$  at  $\sim 8$  cm distance, ensuring  
282 that this angle was slightly greater than the smallest inter-ommatidial angles of  $\sim 4.5^\circ$  in  
283 *Drosophila* (Gonzalez-Bellido et al, 2011). We digitized and analyzed only the flight  
284 trajectories within the 8 cm radius from the odor source. From the 3D flight trajectories, we  
285 calculated several flight variables of which four best captured the spatio-temporal features of  
286 their trajectories (Fig 1B):

- 287 1. *Flight speed*: the average speed of a fly.
- 288 2. *Flight duration*: the total duration of flight trajectories.
- 289 3. *Hover duration*: the total duration spent by a fly at speeds less than 37.5 mm/s (hover  
290 speed). We chose this cut-off speed because it represents a value closer to true hover  
291 (assuming a body length of 3 mm, which is less than 5 % body length traversed over a  
292 single wing beat duration of  $\sim 4$  ms).
- 293 4. *Tortuosity*: ratio of total distance travelled by the fly to its displacement.

294  
295 Flight activity was non-uniform near the odor source due to steady deceleration of flies as  
296 they narrowed their search. These changes depend on the distance of flies from the odor  
297 source. Hence, we segmented the volume in front of the odor source into  $784 \text{ cm}^3$  (1 cm X 28  
298 cm X 28 cm) cuboids along the length of the wind tunnel (Fig 1B). For each treatment, we  
299 separately analyzed the free-flight behavior in each spatial zone and statistically compared  
300 changes in flight variables across these segments. The calculated values of flight trajectory  
301 variables were not normally distributed (Lilliefors test for normality at  $p < 0.05$ ) and did not

302 have equal variances (Bartlett test for equal variance at  $p < 0.05$ ). Hence, we used non-  
303 parametric tests to compare the statistical significance of observed differences in the flight  
304 variable values. To detect whether any groups were statistically different (at  $p < 0.05$ ) from the  
305 other groups, we used the Kruskal-Wallis test, a non-parametric version of ANOVA. If this  
306 test indicated significant differences between one or more groups, we used the post-hoc  
307 Nemenyi test to compare each group in a pairwise manner and identified which specific  
308 treatments were different from each other.

## 309 **Results**

### 310 *The presence of odor cues alters the response of flies toward visual landmarks*

311 When presented with a *high-contrast non-odorous landmark*, flies maintained an upwind  
312 heading but did not approach the visual landmark (Fig 2A). However, the landmark became  
313 attractive to flies when it emitted an appetitive odor (Fig 2B, C). Before landing, flies aligned  
314 themselves along the plume axis as they approached the *high-contrast odorous landmark*  
315 (Supp. Fig 2B, C), whereas their flight towards the non-odorous landmark was not directed  
316 along any specific axis (Supp. Fig 2A). Flies also flew at significantly slower speeds (Fig.  
317 2D) and for longer duration (Fig. 2E), and their trajectories were more tortuous (Fig. 2F) in  
318 presence of odor cues. In addition, the hover duration was also significantly greater in the  
319 vicinity of an *odorous landmark* than the *non-odorous landmark* (Fig 2G). Thus, the presence  
320 of odor increased flight activity in general. Flight trajectories of flies approaching high- and  
321 low-contrast odorous landmarks were not statistically different from each other (Fig 2D-G).  
322 This shows that the presence of odor cues was necessary and sufficient for flies to seek out a  
323 visual landmark, even when it was of a lower contrast.

### 324 *Flies integrate odor and visual cues prior to landing*

325 We next presented flies with two choices for landing – a *low-contrast landmark* and a *high-*  
326 *contrast landmark*, of which only one was odorous. The two landmarks were separated by 1,  
327 2 or 5 cm respectively in separate treatments. In the first set of experiments, the odor was  
328 paired with a low-contrast landmark (Fig 3 A-E), and in a second set, with a high-contrast  
329 landmark (Fig 4 A-E). If the presence of odor cues is sufficient to determine the landing site,  
330 then the landings should occur only on the odorous landmark regardless of the presence of a  
331 nearby landmark. However, flies showed some likelihood of landing on the *high-contrast*  
332 *non-odorous landmark* rather than the *low-contrast odorous landmark* (Fig 3A-C; Table 1),

333 with the frequency of incorrect landings gradually decreasing as separation between the two  
334 objects increased (Fig. 3A-C, upper panels; Table 1). In contrast, when given a choice  
335 between *high-contrast odorous landmark vs. low-contrast non-odorous landmark*, flies  
336 always chose the former (with a sole exception, Fig. 4A), regardless of the separation  
337 distance between landmarks (Fig 4 A-C, Table 1). Thus, the co-occurrence of odor cue with a  
338 single high-contrast visual cue is sufficient to guarantee that flies will land on that object.

339 The flight duration and tortuosity values for flies approaching a *high-contrast non-odorous*  
340 *landmark* placed at 5 cm from a *low-contrast odorous landmark* were significantly different  
341 from flies approaching a *low-contrast odorous landmark* (Fig. 3 D-E), but the flight  
342 parameters were largely similar for smaller separations. Thus, it costs the flies some time to  
343 investigate the *high-contrast landmark* when it is not the source of odor which means that  
344 their search strategy is influenced by neighboring visual landmarks. The presence of a *low-*  
345 *contrast non-odorous object* also affects the trajectories of the flies if it is placed near a *high-*  
346 *contrast odorous object*, and flight duration and tortuosity were significantly greater when  
347 these were 2 and 5 cm apart (Fig. 4D, E). This shows that the low-contrast landmark is  
348 visible, and its presence influences their trajectories. However, the flies maintained similar  
349 speed and hover duration remained similar when approaching the combination of *low-* (Supp.  
350 Fig 3A, B) or *high-contrast landmarks* (Supp. Fig 3C, D), regardless of the distance between  
351 them.

352 We next pooled flight parameters for all cases in which the odorous object was low-contrast,  
353 whereas the non-odorous object was high-contrast regardless of the distance between them  
354 (blue bars, Fig 5 A-C). The distributions for these data were compared with data from cases  
355 in which the odorous object was high-contrast, but the non-odorous object was low-contrast  
356 (red bars, Fig 5 A-C). Flies flew consistently slower (Fig 5A) and hovered more (Fig 5B) for  
357 similar duration (Fig 5C) in the *low-contrast odorous landmark* treatments (blue) compared  
358 to *high-contrast odorous landmark* (red).

359 The above experiments suggest that flies rely on the synchrony of visual and odor stimuli to  
360 make the decision to land i.e. visual objects do not elicit landing behavior *unless*  
361 accompanied by odor cues, and *vice-versa*. Moreover, visual contrast of non-odorous objects  
362 strongly influences the landing decisions in flies, especially in the vicinity of the odor plume.  
363 This means that flies would have difficulty in finding an odor source in a visually cluttered  
364 environment, a prediction that we tested in the next set of experiments.

365 *Visual clutter density influences landing on odor sources*

366 We presented flies with multiple *high-contrast landmarks*, only one of which was odorous.  
367 This created a visual clutter of several identical landmarks from which flies had to choose the  
368 correct odor source. We then tested their odor localizing ability at *low* and *high* density of  
369 visual clutter. For the *high visual clutter density* treatment, we placed seven identical  
370 landmarks at 1 cm separation from each other (Fig 6A). These were followed by two  
371 treatments with *low visual clutter density*; one with seven landmarks (Fig 6B), and another  
372 with only three landmarks (Fig 6 C) separated by 3 cm.

373 Flies were more likely to land on non-odorous landmarks when visual clutter density was  
374 greater (Fig 6 A-C; Table 1), with a majority of the incorrect landings occurring on  
375 landmarks immediately adjacent the odor source. Increased separation between odorous and  
376 non-odorous landmarks elicited more elaborate search trajectories (Fig 6 A-C); flies flew  
377 significantly slower (Fig 6 D), increased the flight duration (Fig 6 E) and hover duration (Fig  
378 6 F) when the visual clutter density was low. Surprisingly, flies in the high-density visual  
379 clutter flew at speeds statistically indistinguishable from a single *high-contrast odorous*  
380 *landmark* treatment (Fig 6 D) and their tortuosity was also not affected by the addition of  
381 multiple landmarks (Supp. Fig 3 E). Thus, presence of a low-density visual clutter meant that  
382 flies searched more and longer for the odor source, and were more likely to find the correct  
383 odorous object as compared to high-density clutter.

384 *Flies decrease their speed when they encounter odor*

385 In the above experiments, flies consistently decreased their speed upon intercepting the odor  
386 plume, the approximate location of which was determined using smoke visualization (Fig 1B-  
387 C; Supp. Fig 1; see Methods and Supplementary video). How does an encounter with odor  
388 plume influence their flight on an instantaneous basis? To address this question, we examined  
389 trajectories of the flies immediately before and after the plume encounter within our region of  
390 interest. To avoid confounding the flight-related vs landing-related speed changes, we  
391 analyzed the data for only those flies that first encountered the plume at a distance of greater  
392 than 4 cm from the landing point (odor encounters in the range of 4-8 cm from the odor  
393 source location were analyzed). A comparison of the speeds of individual flies 250 ms before  
394 and after they intercepted the odor plume revealed that their speed decreases sharply in the  
395 time duration of approximately 50-100 ms immediately following plume encounter (Fig 7A-  
396 D; also see Supp. Fig 4 for more examples of trajectories). These speed changes are not part

397 of their regular repertoire, as shown by the absence of changes in speed in the 250 ms  
398 duration before and after an arbitrary time point 1000 ms pre- and post-odor interception in  
399 each fly (Supp. Fig 5). However, their speed distribution shifts to lower speeds (Fig 7C) and  
400 their mean speed decreases (Fig 7D) immediately after encountering the odor plume.

#### 401 *Flies can localize odor sources in the absence of airflow*

402 How do flies alter their search strategies in absence of airflow when directional cues are not  
403 clear? To address this question, we conducted trials that required flies to locate a low-contrast  
404 odorous landmark in still air. The trajectories of these flies were not directionally biased, and  
405 spread uniformly around the odor source (Fig 8A). Such flies were significantly faster (Fig  
406 8B) and hovered less (Fig. 8C) than those in presence of airflow, however flight parameters  
407 such as flight duration and tortuosity remained unchanged (Supp. Fig 6A, B). The flight  
408 speed in still air conditions (red line; Fig 8D) was consistently greater than in flies tracking a  
409 plume in presence of the airflow (blue line, Fig 8D).

410 How is the ability of flies to distinguish odorous vs. non-odorous landmarks impaired in still  
411 air? We presented the flies with two *high-contrast landmarks*, only one of which was  
412 odorous. These landmarks were separated by 1, 2 and 5 cm respectively (Fig. 9A-C). Flies  
413 performed poorly in identifying the odorous landmark when the separation between the  
414 landmarks was 1 cm (only 60% correct landings, top panel, Fig 9A), but their performance  
415 improved when the separation between odorous and non-odorous landmarks was increased  
416 (75% and 84.2% correct landings for separation of 2 and 5 cm respectively, Fig 9B,C). Flies  
417 travelled for longer durations (Fig 9D) with greater tortuosity (Fig 9E) in the 2 cm separation  
418 case as compared to 5 cm. However, their speed and hover duration were not significantly  
419 different for any arrangement of these objects (Supp. Fig 6C, D).

420 In still air, when flies had to find a *low-contrast odorous landmark* separated from a *high-*  
421 *contrast non-odorous landmark* by 5 cm, they landed on both objects with roughly equal  
422 probability (57% correct landings; Table 1; Fig 10A). On the other hand, they could very  
423 reliably find a *high-contrast odorous landmark* when it was separated by a *low-contrast non-*  
424 *odorous landmark* in still air (95% correct landings; Fig 10B). None of the flight parameters in  
425 these two cases were significantly different from each other (Fig 10 C-F). Thus, their choice is  
426 substantially biased toward high-contrast visual objects in absence of a plume to guide them.  
427 It is also illustrative to compare these treatments with those in which airflow was present for  
428 similar object arrangement (Fig 3C, Fig 4 C) for which airflow and odor plume were present.

429 The ability of the fly to find the odor source was substantially enhanced by the presence of the  
430 plume, which underscores its importance in odor tracking behavior. Note also that in both  
431 moving and still air, flies tended to hover in front of objects just before landing (compare Supp.  
432 Fig. 8 A, B with Fig 8 C, D).

433 Thus, synchronous odor and visual cues are also essential for odor source location in still air  
434 conditions. Barring localized micro-flows (e.g. due to wing motion), the odor in this case  
435 spreads largely through diffusion, to form a gradient, which the flies appear to track in still air.

436

## 437 **Discussion**

438 Locating an odor source in a visually-cluttered environment is a complex task which requires  
439 inputs from multiple senses, including the visual and olfactory modalities which then drive  
440 motor responses (e.g. Raguso and Willis, 2002; Frye et al., 2003; Dekker and Cardé, 2005).  
441 For flying insects, this means controlling flight in three dimensions in environments that are  
442 typically turbulent (Murlis, 1992). Because the proper identification of odor sources is  
443 essential to gain access to food and mates, the question of how insects solve this problem has  
444 been of central importance to biologists over several decades (e.g. Kennedy, 1983; Raguso  
445 and Willis, 2002).

446 What basic rules guide the flies to odor sources in visually ambiguous conditions? Previous  
447 studies have outlined several specific behaviors including optomotor anemotaxis, cast-and-  
448 surge maneuvers, odor-guided salience changes etc. which enable insects to arrive in the  
449 vicinity of an odor source (e.g. Kennedy and Marsh, 1974; Vickers, 2000; Chow and Frye,  
450 2008). Our study sought to specify how insects, having arrived in the general region of an  
451 odor source, pinpoint its precise location from among many possibilities in the decisive  
452 moments before landing.

### 453 *Odor resolution is vision-dependent*

454 One key finding of this study is that when flies encounter an odor plume that indicates the  
455 presence of a potential food source, they *decrease* their speed with a latency of under 100 ms  
456 (Fig. 7A-D). This behavior may serve two functions: first, it provides the flies with greater  
457 sampling time to determine the spatio-temporal co-occurrence of odor and visual feedback.  
458 Second, it increases the probability of repeated odor encounters, which would enable flies to

459 determine the general orientation of an odor source. These observations contrast with  
460 previous studies which showed that flies *increase* their groundspeed approximately  $190 \pm 75$   
461 ms following a plume encounter (Budick and Dickinson, 2006; van Breugel and Dickinson,  
462 2014; Bhandawat et al, 2010). However, in those studies there were no visible landmarks at  
463 the time of odor encounter, and hence landing was not imminent. In contrast, the trajectories  
464 reported here were derived from a region that was between 4-8 cm from the nearest visible  
465 odor source. This suggests that odor encounter triggers a behavioral switch in flies that causes  
466 them to seek visual objects, even though these had no inherent salience when odor was absent  
467 (Fig. 2A; also Budick and Dickinson, 2006). We also show an increased bias towards objects  
468 of a higher visual contrast and situated in the immediate vicinity of the odor source (Fig. 3A-  
469 C, 6 A-C), which is consistent with van Bruegel and Dickinson (2014). The bias towards  
470 high-contrast objects means that flies may sometimes incorrectly identify the odor source  
471 location if it does not exactly overlap with a visual landmark (Fig 3A). However, when the  
472 two objects are sufficiently separated, flies are more successful at correctly identifying the  
473 odor source location (Fig. 3C). Thus, flies depend on the spatiotemporal co-occurrence of  
474 visual and odor cues to identify the odor source, and their odor resolution is vision-  
475 dependent.

476 In presence of multiple landmarks (visual clutter), flies initiate a search behavior which is  
477 characterized by slower speed, increased tortuosity and longer flight / hover duration (Fig.  
478 3D-E, 6D-F). This may help ascertain the co-occurrence of visual and odor cues by allowing  
479 for more time to process odor. The limited resolution of their compound eyes means that flies  
480 may not correctly pinpoint the odor source location within a high-density clutter (Fig. 6A).  
481 Their search behavior is significantly enhanced when the location of the landmark does not  
482 match with odor cue. In contrast, a single odorous landmark does not elicit an elaborate  
483 spatial search. Instead, flies steadily decrease their distance from the odor plume axis while  
484 approaching the target thus honing in on the odor plume, regardless of whether the landmark  
485 was high- (Supp. Fig 2C) or low-contrast (Supp. Fig 2D). These findings demonstrate the  
486 dominant influence of visual landmarks during odor searches, which are especially important  
487 in natural scenarios.

#### 488 *Flies use a different strategy for odor tracking in absence of airflow*

489 How do insects find odor sources in still air conditions? Although airflow is an important cue  
490 for odor-seeking insects (e.g. Kennedy and Marsh, 1974 Budick and Dickinson, 2006; Willis



491 and Arbas, 1991), flies could also successfully track down an odor source in still air (Fig 8-  
492 10). In static air, odor propagation is isotropic and generates uniform concentration gradients  
493 around the odor source, although these gradients may be locally disturbed by self-induced  
494 flow from flapping wings (Sane and Jacobson, 2006), possibly aiding odor detection (Loudon  
495 and Koehl, 2000). Do flies use similar strategies when tracking odor in still air? Without  
496 airflow to break the odor symmetry, flies approach the odor source equally from all directions  
497 (Fig 8A). They fly at faster speeds (Fig 8B) and hover less (Fig 8C) as they steadily hone in  
498 on the odor source, as also reported in mosquitoes tracking CO<sub>2</sub> in still air (Cardé and Lacey,  
499 2012; Breugel and Dickinson, 2015). This alternate strategy is robust because it still allows a  
500 majority of flies to find the correct odor source from two visually identical objects separated  
501 by 2 cm or more (Fig 9A-C, Table 1). Thus, flies adopt different strategies when searching  
502 the odor sources in the presence vs. absence of airflow (summarized in Fig 11).

### 503 *Olfactory working memory in flies?*

504 Whether in presence or absence of airflow, a large majority (76%) of the 311 flies tracking  
505 multiple visual landmarks across 13 different treatments landed successfully on the odor  
506 source, underscoring the robustness of combined strategies of plume- and gradient-tracking.  
507 A key ingredient of these strategies, not directly addressed in our experiments, is a neural  
508 mechanism to ensure that flies continue to search the plume even after leaving the plume.  
509 Some examples of such trajectories, for both successful and unsuccessful searches, are shown  
510 in Supp. Fig. 7.

511 For spatial navigation tasks, the existence of a spatial working memory has been well-  
512 demonstrated in the case of visual tracking, in which *Drosophila* flies moving between two  
513 vertical poles maintain their direction for several seconds after these landmarks became  
514 extinct or reappeared elsewhere (Neuser et al., 2008). We hypothesize the presence of an  
515 ‘olfactory working memory’, which keeps track of the previous odor encounters, and which  
516 may ensure that flies continue their search for odor sources even when odor cues become  
517 temporarily extinct. A fundamental requirement for odor working memory is to successfully  
518 register an odor encounter, and display behavior that suggests that it recalls this odor  
519 encounter. As shown in this study, flies sharply decrease their flight speed after a putative  
520 odor encounter (Fig 7 A-D). Moreover, a majority of the flies maintain an attraction towards  
521 visual landmarks even without frequent odor encounters. In the absence of airflow, a large  
522 fraction of the flies (30%, 2 cm separation; Fig 9B) iteratively approached the identical

523 landmarks before landing on the correct odor source (Supp. Fig 9). Together, these  
524 observations suggest the possibility of an ‘olfactory working memory’, which enables them  
525 to recall a prior plume encounters for several seconds after leaving it. Future studies must  
526 quantify the duration for which this memory lasts, and where in the brain it resides.

### 527 *Visual and olfactory specialization in insects*

528 From an evolutionary perspective, how do certain insects evolve to specialize on specific  
529 fruits or plants in their natural surroundings? Examples of such specialists have been reported  
530 in *Drosophila*, including *D. sechellia*, which specializes on the fruit, *Morinda citrifolia* (Higa  
531 and Fuyama, 1993; Jones, 2005), which is toxic to related *Drosophila* species but not to *D.*  
532 *sechellia*. Similarly, *D. pachea* are found on the rotting stems of the cactus *Lophoceros*  
533 *schottii* (Heed and Kircher, 1965). The bias for high-contrast visual cues *vis-a-vis* odor cues  
534 suggests the testable hypothesis that specialist insects are attracted to specific olfactory and  
535 visual cues. Such preferences have been demonstrated, for instance, in the Tephritid fly,  
536 *Rhagoletis pomonella* (Walsh) for apple-like stimuli (e.g. Aluja and Prokopy, 1993). Here,  
537 an attractive odor stimulus makes specific landmarks in the surrounding environment  
538 attractive, which in turn biases their landing decisions (Fig 2B, C). If flies or other insects  
539 have evolved to specialize on odor objects of specific visual signatures, then we expect to see  
540 strong bias towards objects of specific shape or color, or else they may be more biased  
541 towards specific odor stimuli irrespective of their visual appearance. By enabling us to  
542 demonstrate that flies make a weighted decision between odor and visual stimuli, our study  
543 thus provides the methodology to test this hypothesis.

### 544 **Conclusion**

545 Our paper shows that during plume tracking, *Drosophila melanogaster* use both olfactory and  
546 visual cues. In the final phase of odor localization just before landing, the flies decelerate  
547 following an odor plume encounter, and they undergo a behavioral ‘switch’ that enhance  
548 salience towards high-contrast visual objects in the immediate vicinity of the odor plume.  
549 This ‘switch’ ensures that flies continue seeking the odor source even after losing direct  
550 contact with the odor. If the visual objects are far from the odor plume, flies are attracted to  
551 them but less likely to land on them. Thus, when tracking an odor plume, flies determine the  
552 presence of an odor source based on the synchrony of visual and odor cues. In still air, flies  
553 adopt a different strategy, which may involve flying down an olfactory gradient towards

554 visual landmarks. These two strategies provide a robust means for the fly to precisely locate  
555 an odor source.

## 556 **Figure legends**

557 **Figure 1: Experimental setup and flight variables.** (A) Flies tracked the odor plume inside  
558 a customized wind tunnel of test chamber dimensions 1200 mm X 280 mm X 280 mm. The  
559 flies tracking the odor plume (red band) were filmed at 100 fps using two high-speed cameras  
560 mounted above the wind tunnel (approximate filmed region shown as a grey shaded circle)  
561 and their 3D flight trajectories could be reconstructed from these images. (B) A raw image of  
562 a laminar smoke plume from a low-contrast landmark source (view from above, see  
563 methods). The dashed line shows the 80 mm radial cut-off used in our experiments. (C)  
564 Change in plume width vs. distance from the source over 80 mm distance. The dark blue line  
565 shows the mean plume width and the light blue band shows the standard error around the  
566 mean (N = 4). (D) Schematic of a fly's typical approach to an odor source. The trajectories  
567 are broken into black and grey lines, each depicting flight along 10 mm stretches. The odor  
568 plume axis (red line) indicates the alignment of the odor plume, determined using a photo-  
569 ionization detector. We calculated speed, flight duration, tortuosity and hover duration to  
570 quantify the flight behavior in a spherical region of 80 mm diameter from the odor source  
571 (see *Methods*).

572 **Figure 2: Flight behavior in the presence of odorous and non-odorous landmarks.** Flight  
573 trajectories (grey) in the presence of (A) a high-contrast non-odorous landmark (N=20), (B) a  
574 high-contrast odorous landmark (N=22), and (C) a low-contrast odorous landmark (N=24)  
575 respectively. The flies flew towards an odor source that was either high-contrast (filled circle)  
576 or low contrast (open circle) by tracking an odor plume along its axis (red line). Odorous  
577 landmarks are depicted by a concentric red circle around the circles depicting visual objects.  
578 We compared between these treatments for average speed (D), the total flight duration (E),  
579 tortuosity (F) and the hover duration (G) of the flies, depicted as box-and-whisker plots. The  
580 height of the box indicates the range of central 50 % of data around the median (red line).  
581 The length of whiskers represents data that is within 1.5 times the interquartile range. Outlier  
582 data lie outside the whiskers, but are included in analysis. Asterisks represent statistically  
583 significant comparisons ( $p < 0.05$ , Kruskal Wallis test, Nemenyi test) in all figures. The  
584 conventions of depicting odorous objects, box plots and statistical tests is followed  
585 throughout this manuscript.

586 **Figure 3: Landing preference and flight behavior in the presence of segregated odor**  
587 **and visual cues.** Flight trajectories (grey) in the presence of an odorous low-contrast  
588 landmark separated from a non-odorous high contrast landmark by (A) 1 cm (N = 25), (B) 2  
589 cm (N = 25) and (C) 5 cm (N = 23), respectively. Here and elsewhere, the bar plots above the  
590 trajectories, and the associated numbers indicate the absolute number of landings on each  
591 landmark. Also plotted are (D) flight duration and (E) tortuosity of the flies prior to landing.

592 **Figure 4: Landing preference and flight behavior on a high-contrast odorous landmark**  
593 **separated from a low-contrast non-odorous landmark.** Flight trajectories (grey) in the  
594 presence of a high-contrast odorous landmark and a low-contrast non-odorous landmark at  
595 (A) 1 cm (N = 21), (B) 2 cm (N = 20) and (C) 5 cm (N = 20) separation respectively. As  
596 before, bars above the plots indicate the landing preferences on each landmark. The presence  
597 of a low-contrast non-odorous landmark near the high-contrast odorous landmark  
598 significantly increased both their (D) flight duration and (E) tortuosity prior to landing.

599 **Figure 5: Probability distribution of flight variables from trials in which odor cues are**  
600 **separate from visual landmark cues.** The probability distributions for speed (A), hover  
601 duration (B) and flight duration (C) in the presence of low-contrast odor source (blue) and  
602 high-contrast odor source (peach). Flight variables for treatments involving low-contrast  
603 odorous landmark were pooled (Experiment 2; N=97) and compared with the pooled  
604 variables from experiments involving high-contrast odorous landmark (Experiment 3; N=83).  
605 Frequency distribution was obtained by binning the flight variables (speed – 1 cm/s bins;  
606 hover duration – 0.1 s bins; flight duration – 0.5 s bins). Because the sample sizes in both  
607 experiments were different, we normalized the occurrences in each bin with the total  
608 occurrences for each experiment, to obtain the probability distributions from the frequencies.  
609 Statistical comparisons were conducted directly on the raw flight variables. Asterisk depicts  
610 statistically significant differences in the flight variables ( $p < 0.05$ , Kruskal Wallis test).

611 **Figure 6: Odor tracking in visual clutter.** Flight trajectories in the presence of (A) high  
612 density visual clutter (seven landmarks at 1 cm separation, N=24), (B) low density visual  
613 clutter (seven landmarks at 3 cm separation, N = 23) and (C) low density visual clutter  
614 respectively (three landmarks at 3 cm separation, N = 29), respectively. Comparison of flight  
615 parameters of three cases with a single object scenario for (D) speed, (E) flight duration and  
616 (F) hover duration.

617 **Figure 7: Odor encounter modulates the speed of flies.** (A) A sample trajectory of a fly  
618 following odor contact with the plume (red bar of 1.6 cm width), with a closer view in the  
619 inset. Colors represent speed as indicated in the colorbar on the left, and red bar represents  
620 plume location. (B) Speed at first odor contact shown in a 500 ms window centered on the  
621 likely odor contact (250 ms before and 250 ms after odor contact). Individual speed-time  
622 curves (grey) are overlaid by the mean (blue) and standard error (light blue) ( $N = 83$ ). To  
623 avoid the confounding effects of speed changes due to landing responses, only flies that  
624 encountered odor at least 4 cm before landing were used in this analysis. The decrease in  
625 flight speed is observed in less than 100 ms after first odor encounter, but not in the regions  
626 before or after the first odor encounter (also see Supplementary figure 5). (C) Speed  
627 distributions of flies upon odor contact (500 ms window). Speed distributions shifted to the  
628 lower values after odor contact. (D) Mean speeds after the first odor encounter were  
629 significantly lower than speeds before the encounter.

630 **Figure 8: Odor tracking behavior in the absence of airflow cues.** (A) Trajectories of flies  
631 in the presence of an odorous low-contrast landmark in the absence of airflow ( $N = 21$ ; see  
632 Methods for details). Flies flew at significantly greater speeds (B) and hovered less (C) when  
633 airflow was absent. (D) Speed of odor tracking flies in the absence (red) vs. presence of  
634 airflow cue (blue) for 1s before landing. The light colored lines indicate speeds of individual  
635 flies and thick lines indicate their respective means. Shaded regions around the thick lines are  
636 the standard error of the mean.

637 **Figure 9: Flight trajectories in the presence of a high-contrast odorous landmark paired**  
638 **with an identical non-odorous landmark in absence of airflow.** These landmarks are  
639 separated by (A) 1 cm ( $N = 20$ ), (B) 2 cm ( $N = 20$ ) and (C) 5 cm ( $N = 19$ ) respectively (see  
640 Methods for details). Bar plots in the upper panel show the number of landings on each  
641 object. A comparison of the flight durations (D) and tortuosity (E) are shown as box-and-  
642 whisker plots.

643 **Figure 10: Landing preferences for low-contrast vs. high-contrast landmarks in the**  
644 **absence of airflow.** Flight trajectories (grey lines) for (A) an odorous low-contrast landmark  
645 presented in combination with a non-odorous high-contrast landmark ( $N = 21$ ) in contrast to  
646 (B) an odorous high-contrast landmark presented with a non-odorous low contrast landmark  
647 ( $N = 21$ ), separated by 5 cm in both the treatments. The comparisons for (C) flight duration,

648 (D) hover duration, (E) tortuosity and (F) speed between the above two treatments revealed  
649 no statistical differences (Kruskal Wallis test at 95% level of significance).

650 **Figure 11: A flowchart of odor-tracking strategies in flies.** A flowchart derived from  
651 previous studies and the results described here shows distinct strategies employed by flies  
652 based on presence (left) or absence (right) of airflow. In the former case, flies track plumes  
653 whereas in the latter case, they track odor gradients. + signifies the presence and – the  
654 absence of the associated cue. Grey diamond-shaped boxes display sensory cues which  
655 include airflow, odor, landmarks and their combination, and motor actions are displayed in  
656 unfilled rounded rectangles. Both strategies terminate after flies land on the landmark.

657 **Table 1: A summary of experiments.** Small open circles denote low-contrast landmark, and  
658 larger solid circles denote high-contrast visual landmarks. A concentric red circle around the  
659 landmark represents the presence of odor. First 9 rows represent experiments in presence of  
660 airflow (and odor plume), whereas the bottom 5 represent experiments in still air. Correct  
661 landings are defined as the landings on the odorous landmark. The sample sizes (N) per  
662 treatment and p-value of Chi-squared test for each experiment are shown in 4<sup>th</sup> and 5<sup>th</sup>  
663 columns. The Chi-squared test compares the observed landing frequency with the expected  
664 frequency due to random landings on available landmarks ( $p < 0.05$  indicate non-random  
665 landings).

## 666 **Supplementary Figure Legends**

667 **Supplementary Figure 1: Plume visualization and quantification of plume width.** Steady  
668 state smoke plume, viewed from above, for (A) Capillary (low-contrast landmark, N = 4); (B,  
669 C) Capillary (low-contrast landmark) source with spherical bead (high-contrast landmark)  
670 separated by 1, 2 cm respectively (N = 4 for both); (D) Spherical bead (high-contrast  
671 landmark, N = 4); (E) 3 spherical beads separated by 1 cm (Visual clutter, N = 4). The red  
672 bands show the averaged plume at steady-state with yellow lines indicating the median (see  
673 methods). (F) Variation in plume width vs. distance from the source along the plume axis for  
674 smoke-visualized plumes. Colors represent specific treatments. Dark lines show the mean  
675 plume width and the light bands show the standard error around mean.

676 **Supplementary Figure 2: Approach behavior in the presence of non-odorous vs.**  
677 **odorous landmarks**

678 A) In the absence of odor cue, flight trajectories are not along the axis of the visual object,  
679 suggesting that they do not fly towards a visual landmark along its axis (N = 20).

680 B) In the presence of an odor cue, flies gradually decreased their average distance from the  
681 odor plume axis as they approached both a high-contrast odorous landmark (N = 22) and

682 C) low-contrast odorous landmark (N = 24).

683 **Supplementary Figure 3: Comparison of additional flight variables for vision-odor**  
684 **separation and visual clutter experiments.**

685 Box-plots of flight variables for flight trials, which do not show any statistically significant  
686 differences while plume tracking in presence of visual landmarks. (A, B) low-contrast  
687 odorous landmarks are paired with high-contrast non-odorous landmarks at different  
688 separation distances (only low-contrast odorous landmark, 1cm, 2 cm and 5 cm). These  
689 include speed (A) and hover duration (B). Similar plots for (C, D) high-contrast odorous  
690 landmarks paired with low-contrast non-odorous landmarks (only high-contrast odorous  
691 landmark, 1cm, 2 cm and 5 cm) including speed (C) and hover duration (D). (E) In the visual  
692 clutter treatment, tortuosity of the flight trajectories did not change significantly across  
693 different arrangements of visual clutter densities. Details of treatments, sample sizes and  
694 statistics are provided in the Methods section of main text.

695 **Supplementary Figure 4: Additional examples of trajectory plots illustrating speed**  
696 **change in flies following a putative odor encounter**

697 Sample flight trajectories of flies flying in the presence of different landmark arrangements.  
698 These trajectories are examples of how instantaneous speed of flies decelerates after odor  
699 encounters (arrows). Odor plume axis (red line) is surrounded by the cylindrical odor plume,  
700 assumed to be approximately 1.6 cm wide (light red band). Flight speed is depicted using a  
701 color map. Shown here are sample flight trajectories in the presence of (A) a single low-  
702 contrast odorous landmark, and a combination of low-contrast odorous landmark and a high-  
703 contrast non-odorous landmark at (B) 1 cm and (C) 2 cm separation. (D) Sample trajectory in  
704 the presence of low-density visual clutter of 3 landmarks with odor on the central landmark.

705 **Supplementary Figure 5: Speed change before and after odor encounter**

706 (A, B) Speed vs. time for individual flies 1250 ms before (N = 29) and after (N = 134) first  
707 odor contact (grey; 500 ms window). The mean (blue) and the standard error of the individual

708 speeds (light blue) of these plots are also shown. Only flies that first encountered odor at least  
709 4 cm before landing were used for this analysis to avoid landing related speed changes (see  
710 Methods). (C) Speed distributions of flies 1250-1000 ms (peach) and 1000-750 ms (blue)  
711 before odor contact (500 ms window). (D) Speed distributions of flies 1250-1000 ms (peach)  
712 and 1000-750 ms (blue) after odor contact (500 ms window). Distributions remain similar  
713 during both pre and post time windows. (E, F) Speed values were not significantly different  
714 during both pre and post 1250ms of odor encounter. ( $p < 0.05$ , Kruskal Wallis test, Nemenyi's  
715 test).

716 **Supplementary figure 6: Box-plots of flight variables for flight trials, which show no**  
717 **statistically significant differences in presence of still air and visual landmarks.** A)  
718 Flight duration and B) tortuosity of the flies tracking a low-contrast odorous landmark did not  
719 significantly vary with the presence or absence of airflow cue. Flies also did not have  
720 significant differences in the C) speed and D) hover duration, when tracking high-contrast  
721 odorous landmark in the presence of a high-contrast non-odorous landmark at various  
722 separation distances (1, 2 and 5 cm).

723 **Supplementary figure 7: Sample flight trajectories of flies that sample odorous**  
724 **landmarks after leaving the odor plume.** Sample flight trajectories in which flies are away  
725 from the plume (of approximate width of 1.6 cm, see methods) for approximately 1 sec (A),  
726 2.4 sec (B) , 1.9 sec (C), 1.7 sec (D), 3 sec (E), and 1.24 sec (F). The segments of flight  
727 trajectories in which flies were outside the odor plume after odor contact are highlighted in  
728 black and the rest of the trajectory is shown in gray color. (F) The sample flight trajectories  
729 obtained from treatments in Experiment 2 (A, B) and from Experiment 4 (C-F). Such flight  
730 trajectories suggest that flies can maintain odor tracking behavior and landing even without  
731 immediate odor encounters.

732 **Supplementary Figure 8: Hover duration vs. distance from the odor source in presence**  
733 **and absence of airflow.** Total hover duration in the presence of airflow for A) low-contrast  
734 odorous landmark and B) high-contrast odorous landmark and low-contrast non-odorous  
735 landmark at 5 cm separation. Similarly, the total hover duration in the absence of airflow for  
736 C) low-contrast odorous landmark and D) high-contrast odorous landmark and low-contrast  
737 non-odorous landmark at 5 cm separation. Hover duration prior to landing increases both in  
738 the presence and absence of airflow. Statistically significant differences are indicated by the



739 asterisk symbol above the box-plots ( $p < 0.05$ , Kruskal Wallis test, Nemenyi's test; see  
740 Methods for details).

741 **Supplementary figure 9: Sample trajectories illustrating odor-tracking in absence of**  
742 **airflow.**

743 Examples of flight trajectories from a treatment in which the separation between the odorous  
744 and non-odorous landmark was 2 cm in absence of airflow (Experiment 6). (A-C) Examples  
745 in which flies found the correct location of the odorous landmark after search and (D)  
746 example in which the fly landed incorrectly on the non-odorous landmark despite search.  
747 These examples are presented to highlight both the robustness and difficulty inherent in  
748 searching for an odor source in absence of airflow.

749 **References**

- 750 **Aluja, M. and Prokopy, R. J.** (1993). Host odor and visual stimulus interaction during  
751 intratree host finding behavior of *Rhagoletis pomonella* flies. *J. Chem. Ecol.* **19**, 2671–  
752 2696.
- 753 **Balkenius, A., Rosén, W. and Kelber, A.** (2006). The relative importance of olfaction and  
754 vision in a diurnal and a nocturnal hawkmoth. *J. Comp. Physiol. A* **192**, 431–437.
- 755 **Bhandawat, V., Maimon, G., Dickinson, M. H. and Wilson, R. I.** (2010). Olfactory  
756 modulation of flight in *Drosophila* is sensitive, selective and rapid. *J. Exp. Biol.* **213**,  
757 3625–3635.
- 758 **Budick, S. A. and Dickinson, M. H.** (2006). Free-flight responses of *Drosophila*  
759 *melanogaster* to attractive odors. *J. Exp. Biol.* **209**, 3001–3017.
- 760 **Campbell, S. A. and Borden, J. H.** (2006). Close-range, in-flight integration of olfactory  
761 and visual information by a host-seeking bark beetle. *Entomol. Exp. Appl.* **120**, 91–98.
- 762 **Cardé, R. T. and Lacey, E. S.** (2012). Location of and landing on a source of human body  
763 odour by female *Culex quinquefasciatus* in still and moving air. *Physiol. Entomol.* **37**,  
764 153–159.
- 765 **Chow, D. M. and Frye, M. A.** (2008). Context-dependent olfactory enhancement of  
766 optomotor flight control in *Drosophila*. *J. Exp. Biol.* **211**, 2478–2485.
- 767 **Dekker, T. and Cardé, R. T.** (2005). Carbon dioxide instantly sensitizes female yellow  
768 fever mosquitoes to human skin odours. *J. Exp. Biol.* **208**, 2963–2972.
- 769 **Duistermars, B. J. and Frye, M. A.** (2008). Crossmodal Visual Input for Odor Tracking  
770 during Fly Flight. *Curr. Biol.* **18**, 270–275.
- 771 **Duistermars, B. J. and Frye, M. A.** (2010). Multisensory integration for odor tracking by  
772 flying *Drosophila*. **3**, 60–63.
- 773 **Duistermars, B. J., Chow, D. M. and Frye, M. A.** (2009). Flies Require Bilateral Sensory

- 774 Input to Track Odor Gradients in Flight. *Curr. Biol.* **19**, 1301–1307.
- 775 **Farkas, S. R., & Shorey, H. H.** (1972). Chemical trail-following by flying insects: a  
776 mechanism for orientation to a distant odor source. *Science*, *178*(4056), 67-68.
- 777 **Frye, M. A. and Dickinson, M. H.** (2004). Motor output reflects the linear superposition of  
778 visual and olfactory inputs in *Drosophila*. *J. Exp. Biol.* **207**, 123–131.
- 779 **Frye, M. A., Tarsitano, M. and Dickinson, M. H.** (2003). Odor localization requires visual  
780 feedback during free flight in *Drosophila melanogaster*. *J. Exp. Biol.* **206**, 843–855.
- 781 **Fuller, S. B., Straw, A. D., Peek, M. Y., Murray, R. M. and Dickinson, M. H.** (2014).  
782 Flying *Drosophila* stabilize their vision-based velocity controller by sensing wind with  
783 their antennae. *Proc. Natl. Acad. Sci.* **111**, E1182–E1191.
- 784 **Gonzalez-Bellido, P. T., Wardill, T. J., & Juusola, M.** (2011). Compound eyes and retinal  
785 information processing in miniature dipteran species match their specific ecological  
786 demands. *Proceedings of the National Academy of Sciences*, *108*(10), 4224-4229.
- 787 **Goyret, J., Markwell, P. M. and Raguso, R. A.** (2007). The effect of decoupling olfactory  
788 and visual stimuli on the foraging behavior of *Manduca sexta*. *J. Exp. Biol.* **210**, 1398–  
789 1405.
- 790 **Goyret, J., Pfaff, M., Raguso, R. A. and Kelber, A.** (2008). Why do *Manduca sexta* feed  
791 from white flowers? Innate and learnt colour preferences in a hawkmoth.  
792 *Naturwissenschaften* **95**, 569–576.
- 793 **Hedrick, T. L.** (2008). Software techniques for two- and three-dimensional kinematic  
794 measurements of biological and biomimetic systems. *Bioinspir. Biomim.* **3**, 1–7.
- 795 **Henneman, M. L., Dyreson, E. G., Takabayashi, J. and Raguso, R. A.** (2002). Response  
796 to walnut olfactory and visual cues by the parasitic wasp *Diachasmimorpha juglandis*. *J.*  
797 *Chem. Ecol.* **28**, 2221–2244.
- 798 **Heisenberg, M. and Wolf, R.** (1984). Vision in *Drosophila*: genetics of microbehavior.  
799 Studies of brain function. *Berlin Heidelberg New York Tokyo: Springer*, 12.
- 800 **Higa, I. and Fuyama, Y.** (1993). Genetics of Food Preference in *Drosophila-Sechellia* .1.  
801 Responses To Food Attractants. *Genetica* **88**, 129–136.
- 802 **Jones, C. D.** (2005). The genetics of adaptation in *Drosophila sechellia*. *Genetica* **123**, 137–  
803 45.
- 804 **Kennedy, J. S.** (1983). Zigzagging and casting as a programmed response to wind-borne  
805 odour: a review. *Physiological Entomology*, *8*(2), 109-120.
- 806 **Kennedy, J. S. and Marsh, D.** (1974). Pheromone-Regulated Anemotaxis in Flying Moths.  
807 **184**, 999–1001.
- 808 **Loudon, C. and Koehl, M. A. R.** (2000). Sniffing by silkworm moth: Wing fanning  
809 enhances air penetration through and pheromone interception by antennae. *J. Exp. Biol.*  
810 **203**, 2977–2990.
- 811 **Murlis, J.** (1992). Odor plumes and how insects use them. *Annu. Rev. Entomol.* **37**, 505–532.

- 812 **Neuser, K., Triphan, T., Mronz, M., Poeck, B. and Strauss, R.** (2008). Analysis of a  
813 spatial orientation memory in *Drosophila*. *Nature* **453**, 1244–1247.
- 814 **Raguso, R. A. and Willis, M. A.** (2002). Synergy between visual and olfactory cues in  
815 nectar feeding by naive hawkmoths, *Manduca sexta*. 685–695.
- 816 **Khurana, T.R., Sane, S.P.** (2016). Airflow and optic flow mediates antennal positioning in  
817 flying honeybees, *eLife* **5**, e14449
- 818 **Sane, S. P. and Jacobson, N. P.** (2006). Induced airflow in flying insects II. Measurement of  
819 induced flow. *J. Exp. Biol.* **209**, 43–56.
- 820 **Schindelin, J., Arganda-carreras, I., Frise, E., Kaynig, V., Longair, M., Pietzsch, T.,**  
821 **Preibisch, S., Rueden, C., Saalfeld, S., Schmid, B., et al.** (2012). Fiji : an open-source  
822 platform for biological-image analysis. *Nat. Methods* **9**, 676–682.
- 823 **Srinivasan, M., Zhang, S., Lehrer, M. and Collett, T.** (1996). Honeybee navigation en  
824 route to the goal: visual flight control and odometry. *J. Exp. Biol.* **199**, 237–244.
- 825 **van Breugel, F. and Dickinson, M. H.** (2014). Plume-Tracking Behavior of Flying  
826 *Drosophila* Emerges from a Set of Distinct Sensory-Motor Reflexes. *Curr. Biol.* **24**,  
827 274–86.
- 828 **van Breugel, F., Riffell, J., Fairhall, A. and Dickinson, M. H.** (2015). Mosquitoes Use  
829 Vision to Associate Odor Plumes with Thermal Targets. *Curr. Biol.* **25**, 2123–2129.
- 830 **Vickers, N. J.** (2000). Mechanisms of Animal Navigation in Odor Plumes. *Biol. Bull.* **198**,  
831 203–212.
- 832 **Vickers, N. J. and Baker, T. C.** (1994). Reiterative responses to single strands of odor  
833 promote sustained upwind flight and odor source location by moths. *Proc. Natl. Acad.*  
834 *Sci.* **91**, 5756–5760.
- 835 **Willis, M. A. and Arbas, E. A.** (1991). Odor-modulated upwind flight of the sphinx moth,  
836 *Manduca sexta* L. *J. Comp. Physiol. A* **169**, 427–440.
- 837 **Willis, M. A., David, C. T., Murlis, J. and Cardé, R. T.** (1994). Effects of Pheromone  
838 Plume Structure and Visual Stimuli on the Pheromone-Modulated Upwind Flight of  
839 Male Gypsy Moths (*Lymantria dispar*) in a Forest (Lepidoptera: Lymantriidae). *J.*  
840 *Insect Behav.* **7**, 385–409.
- 841 **Yorozu, S., Wong, A., Fischer, B. J., Dankert, H., Kernan, M. J., Kamikouchi, A., Ito,**  
842 **K. and Anderson, D. J.** (2009). Distinct sensory representations of wind and near-field  
843 sound in the *Drosophila* brain. *Nature* **458**, 201–205.

844

A

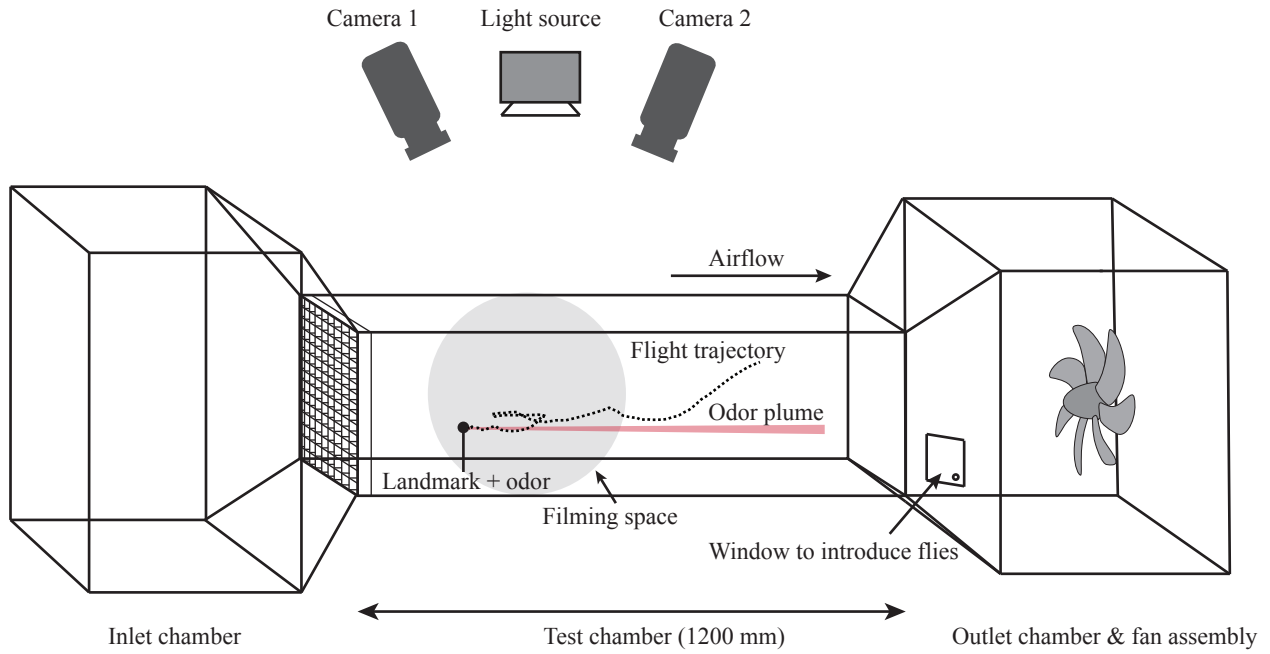

B

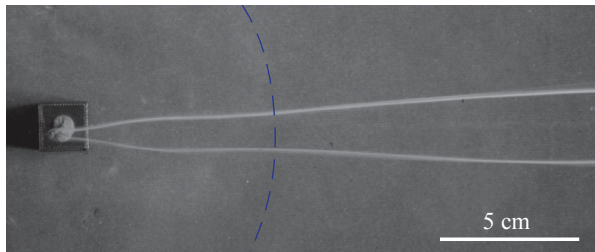

C

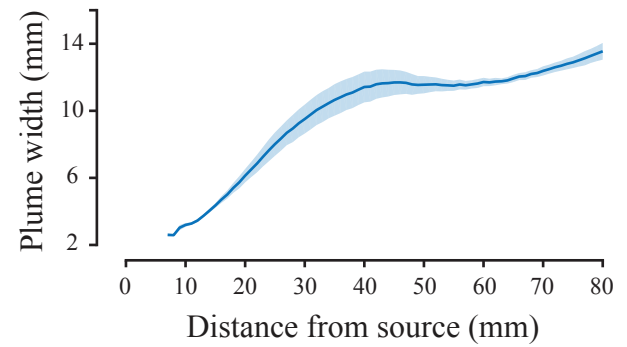

D

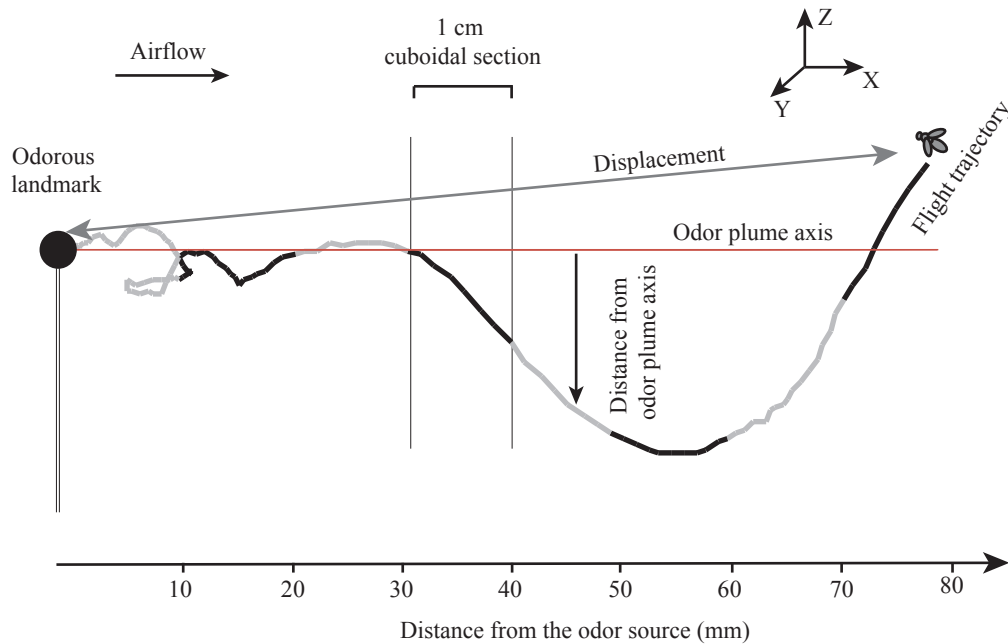

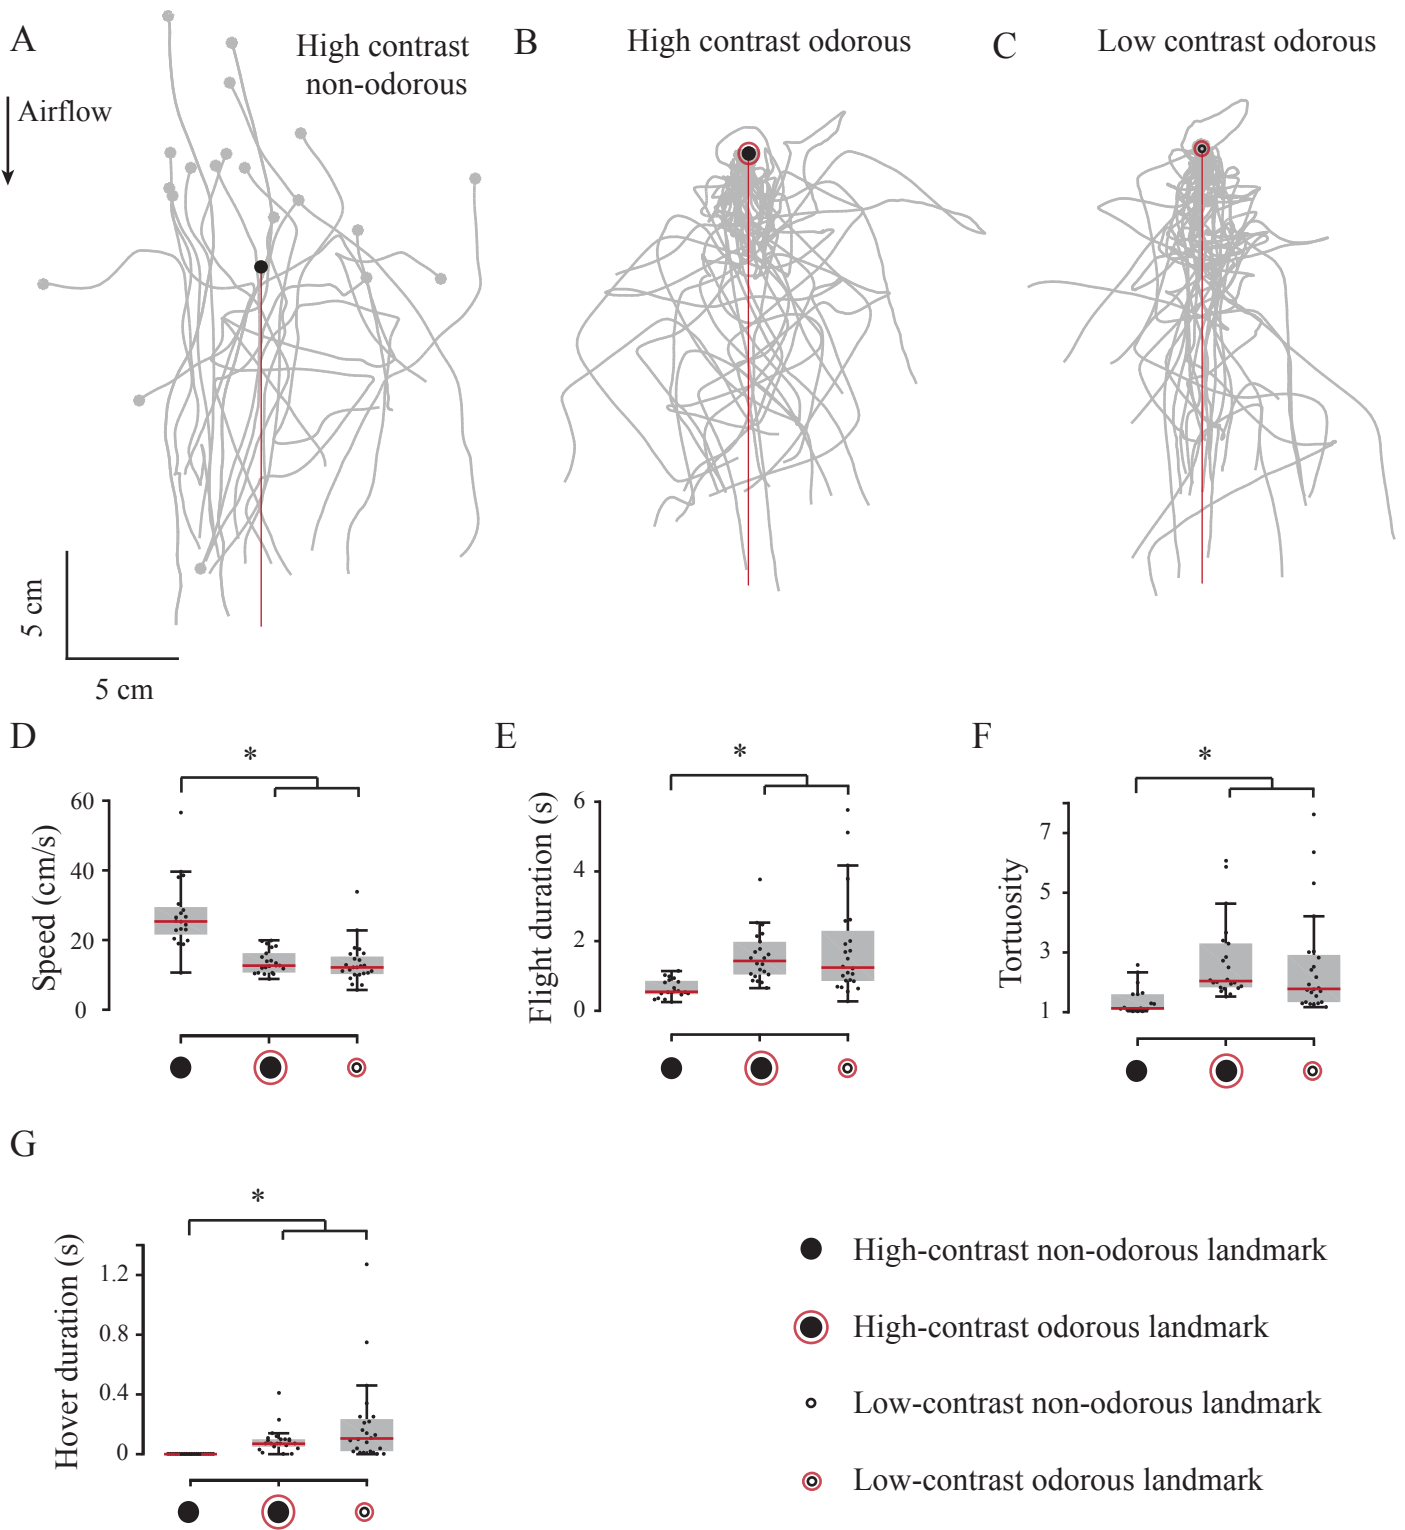

Odor on the low contrast landmark

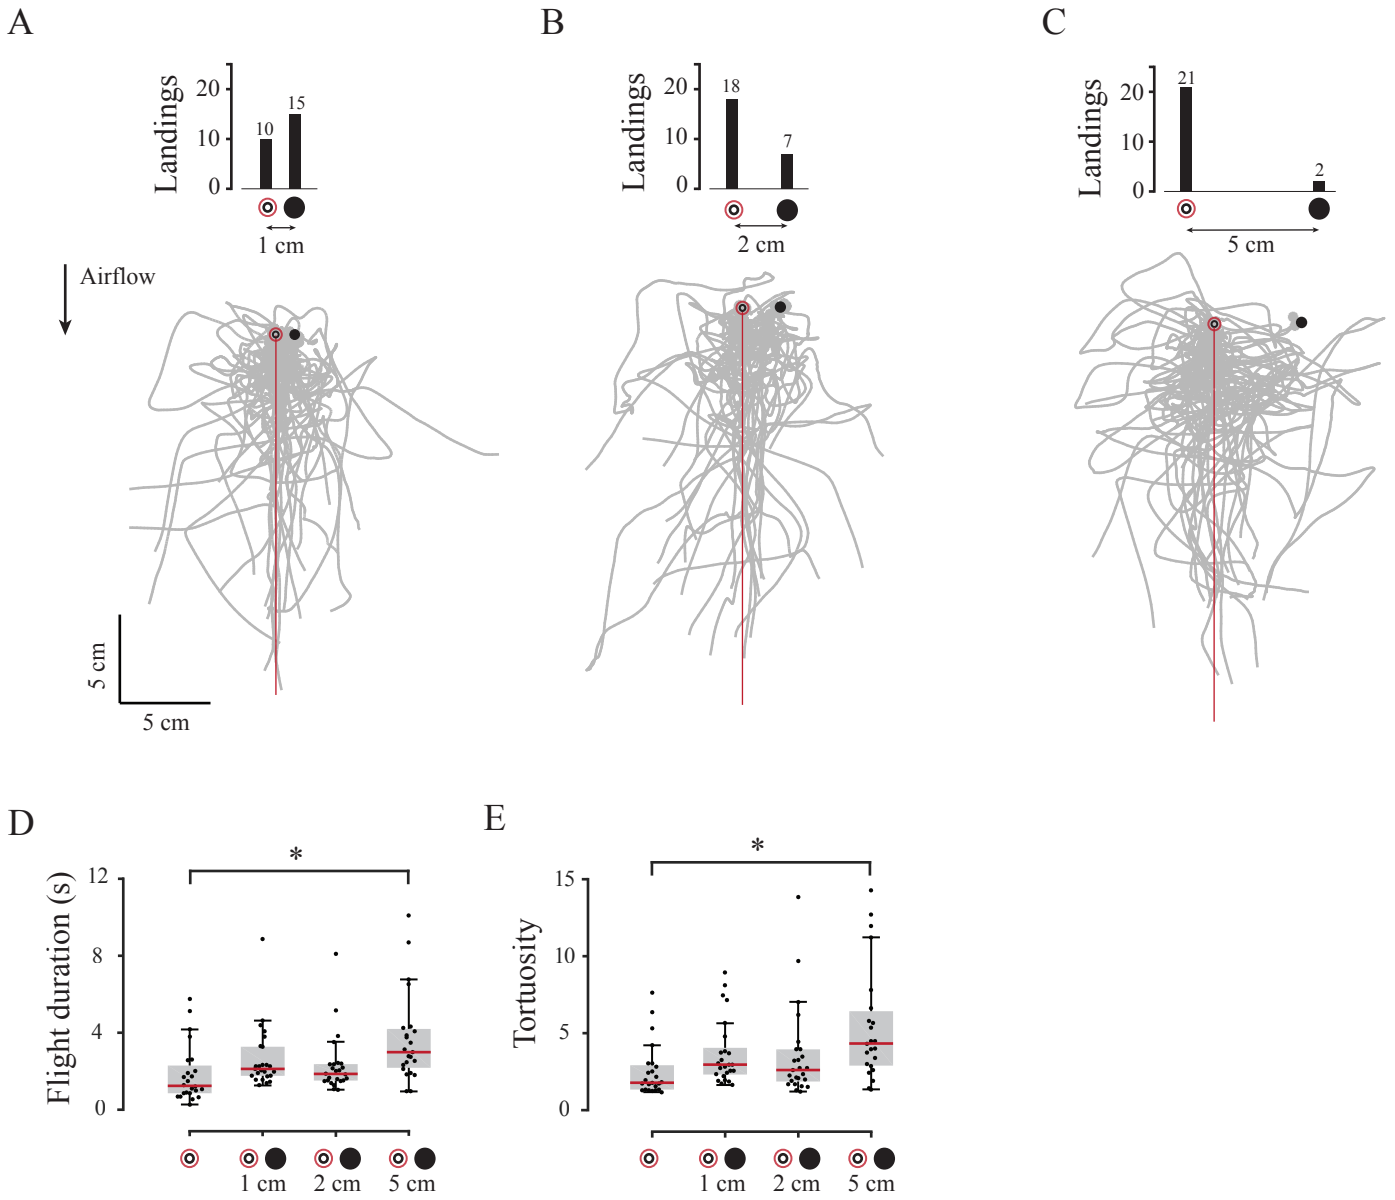

Odor on the high-contrast landmark

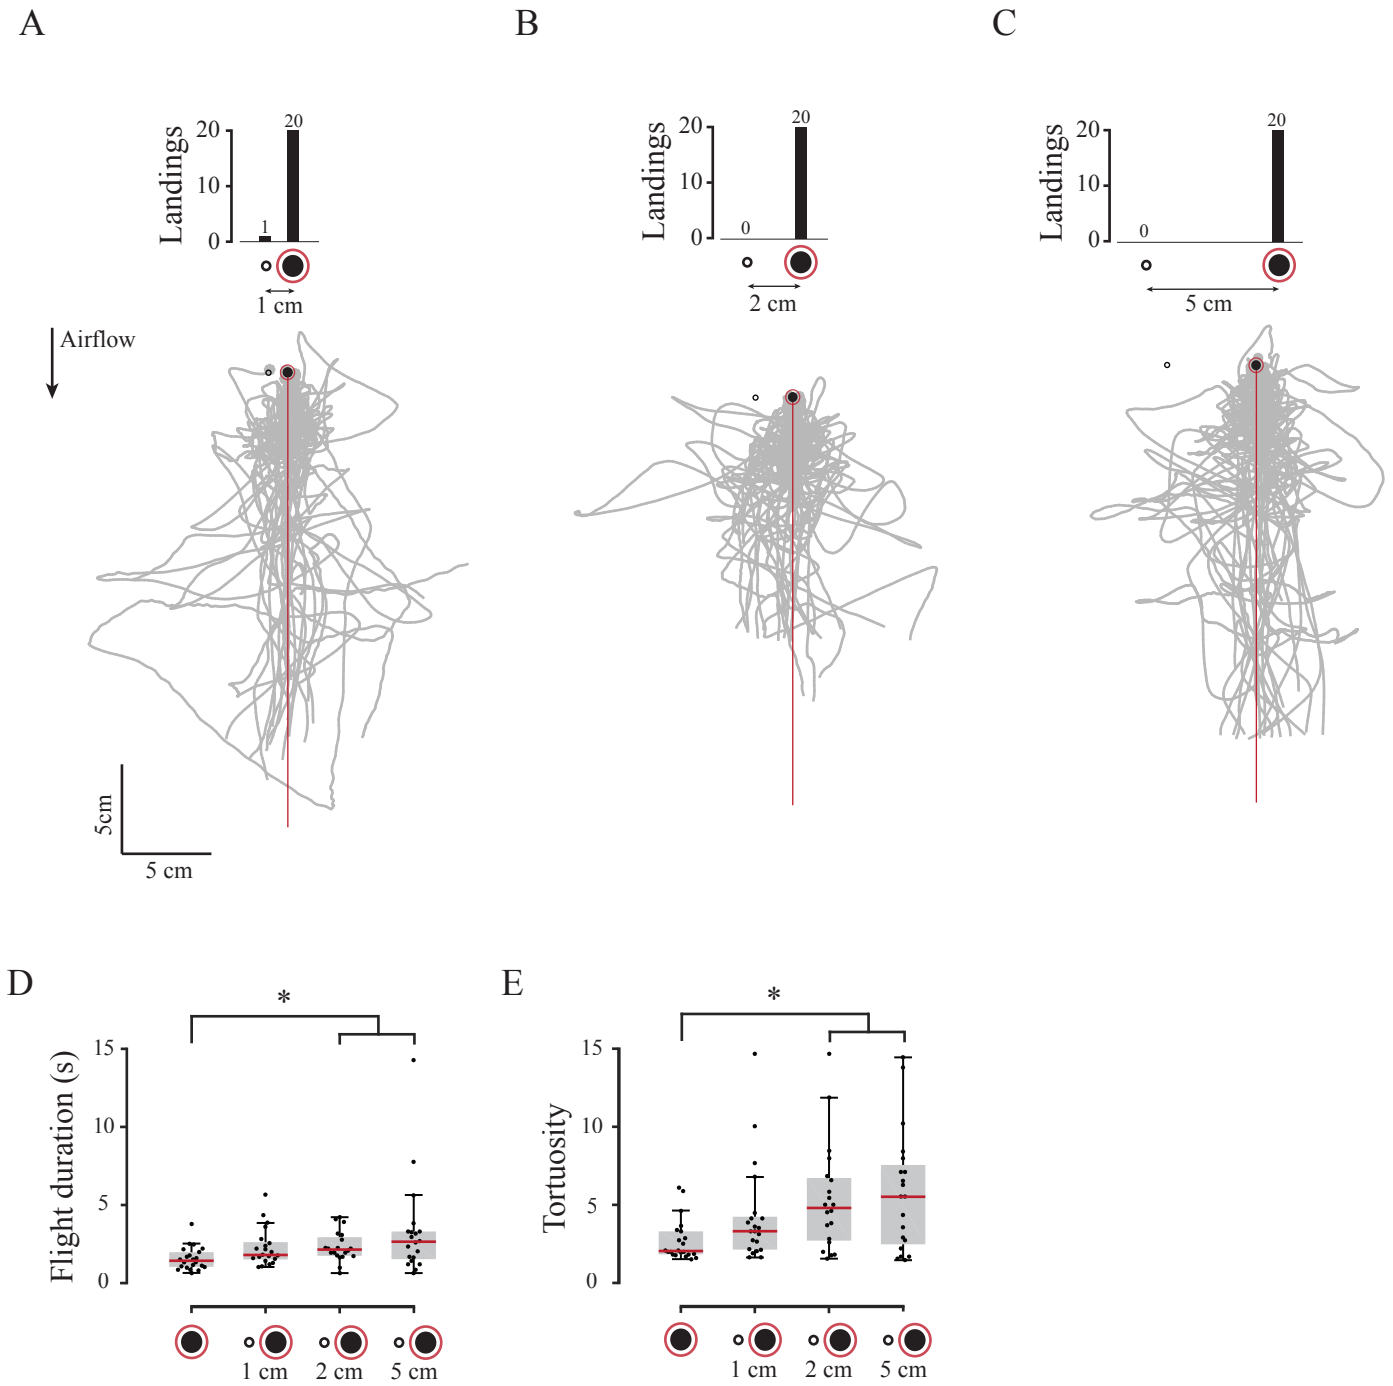

A

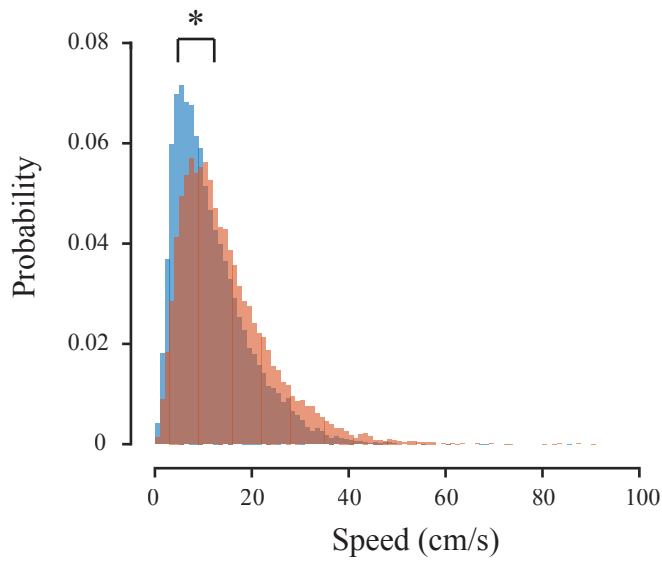

B

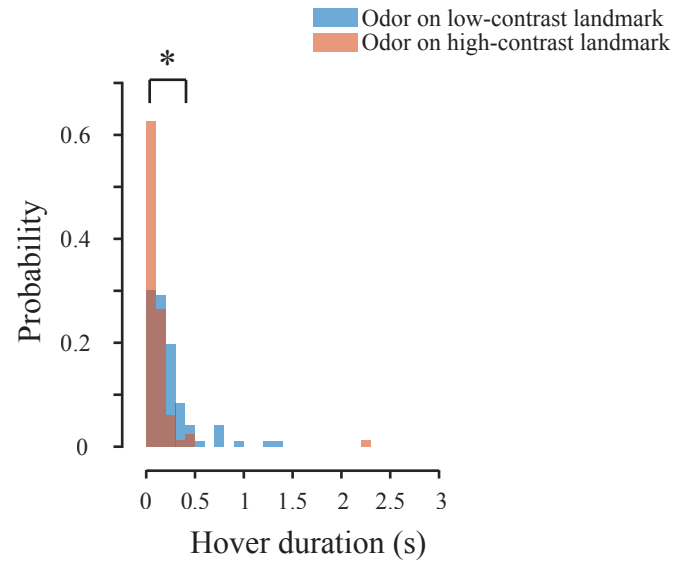

C

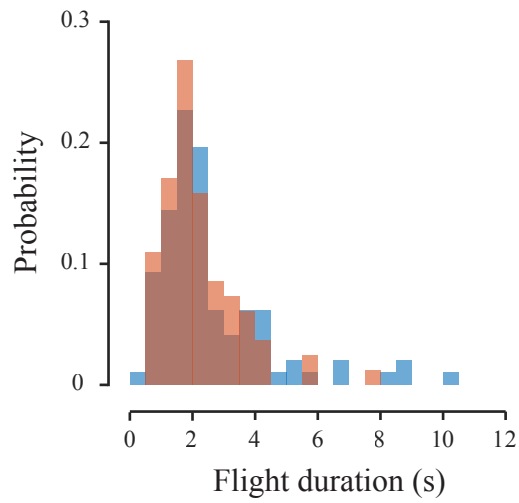



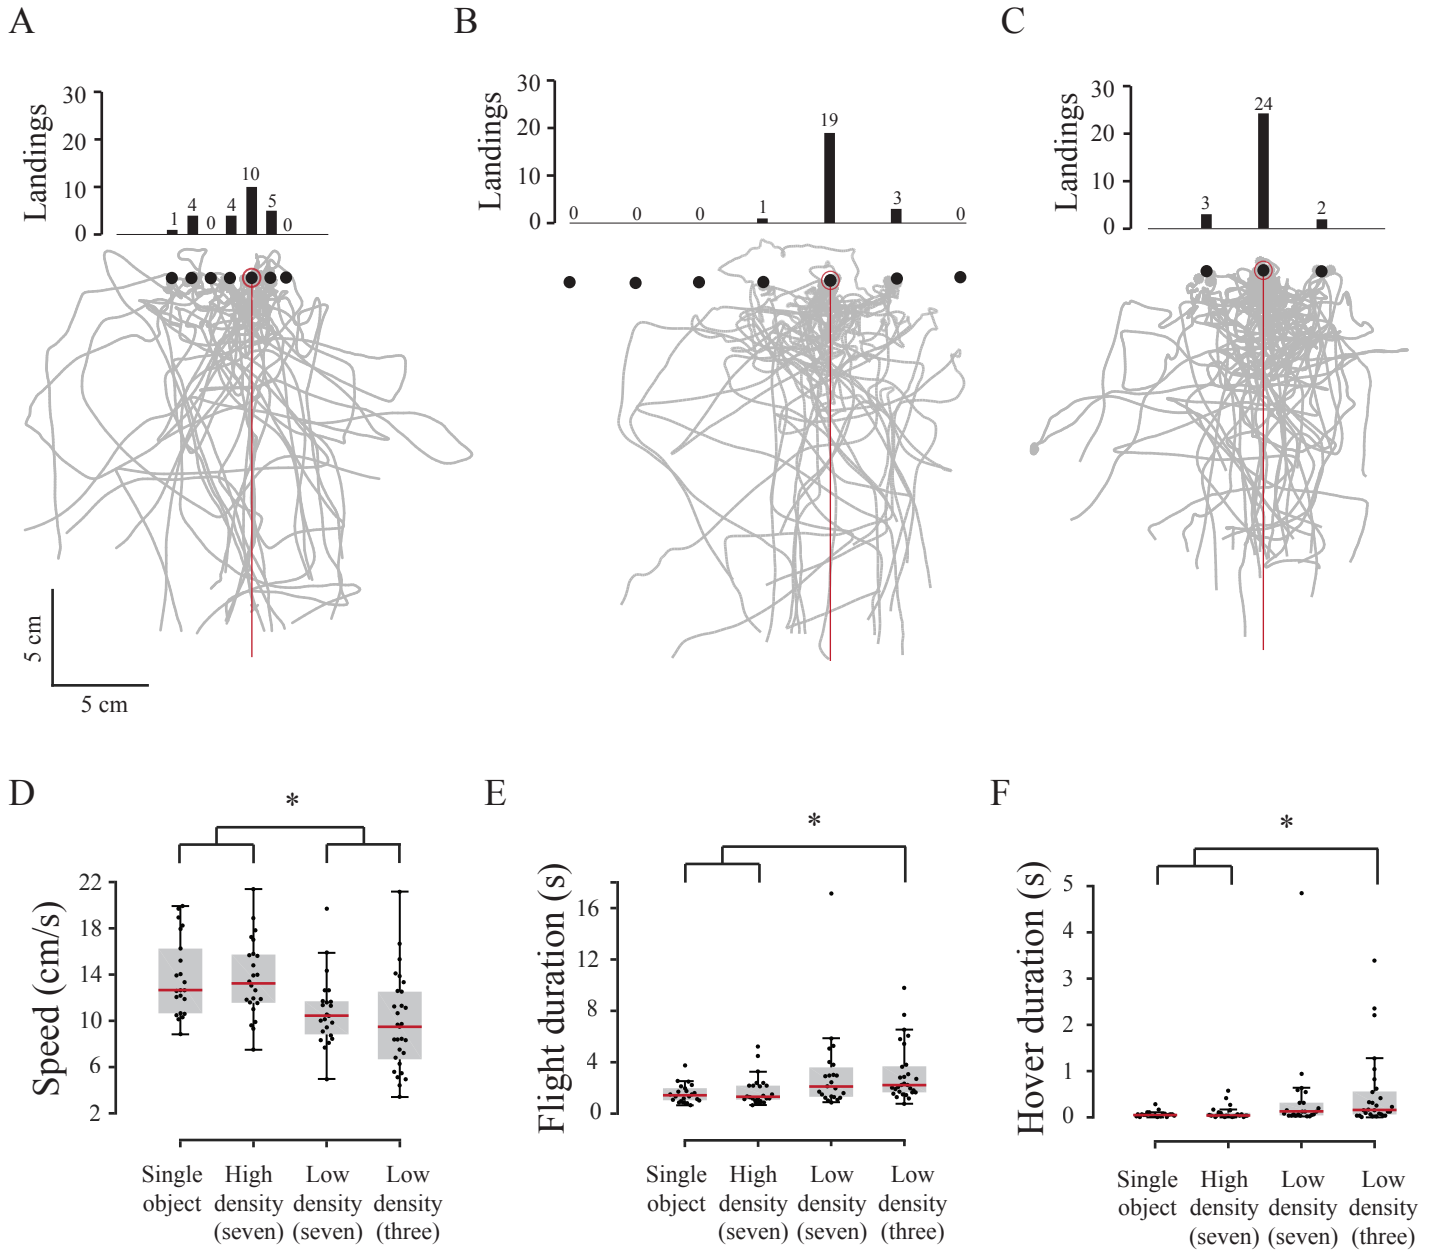

A

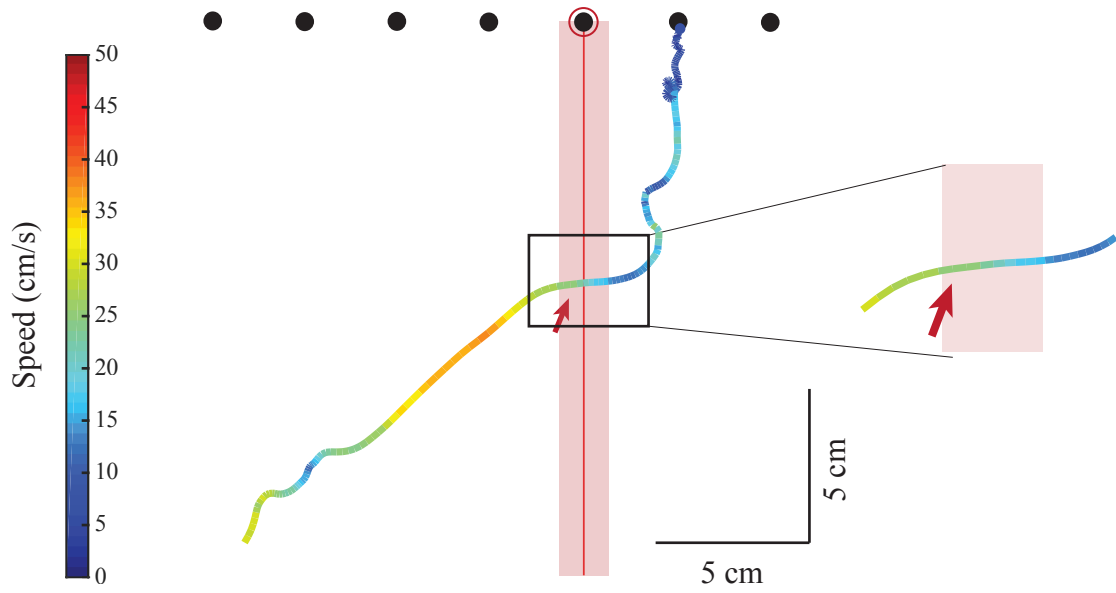

B

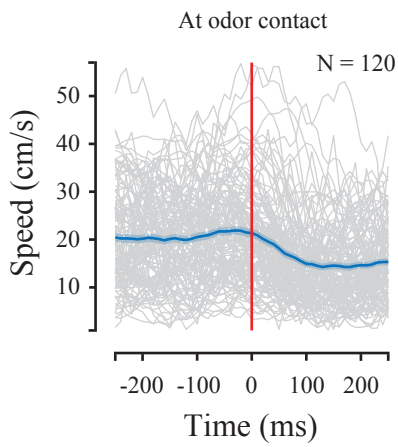

C

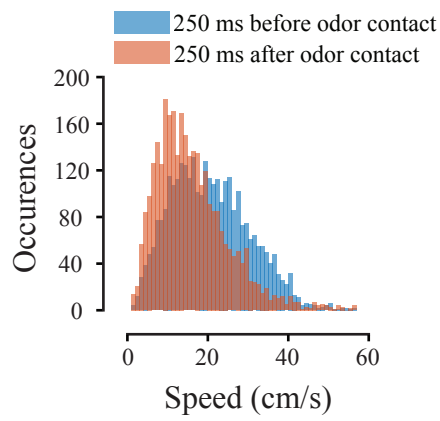

D

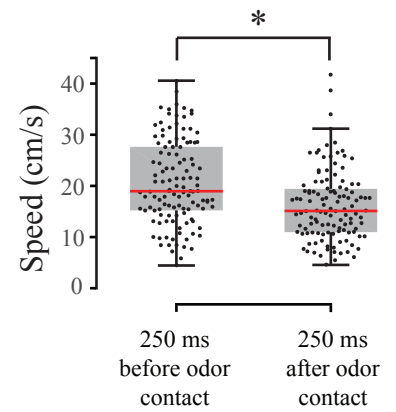

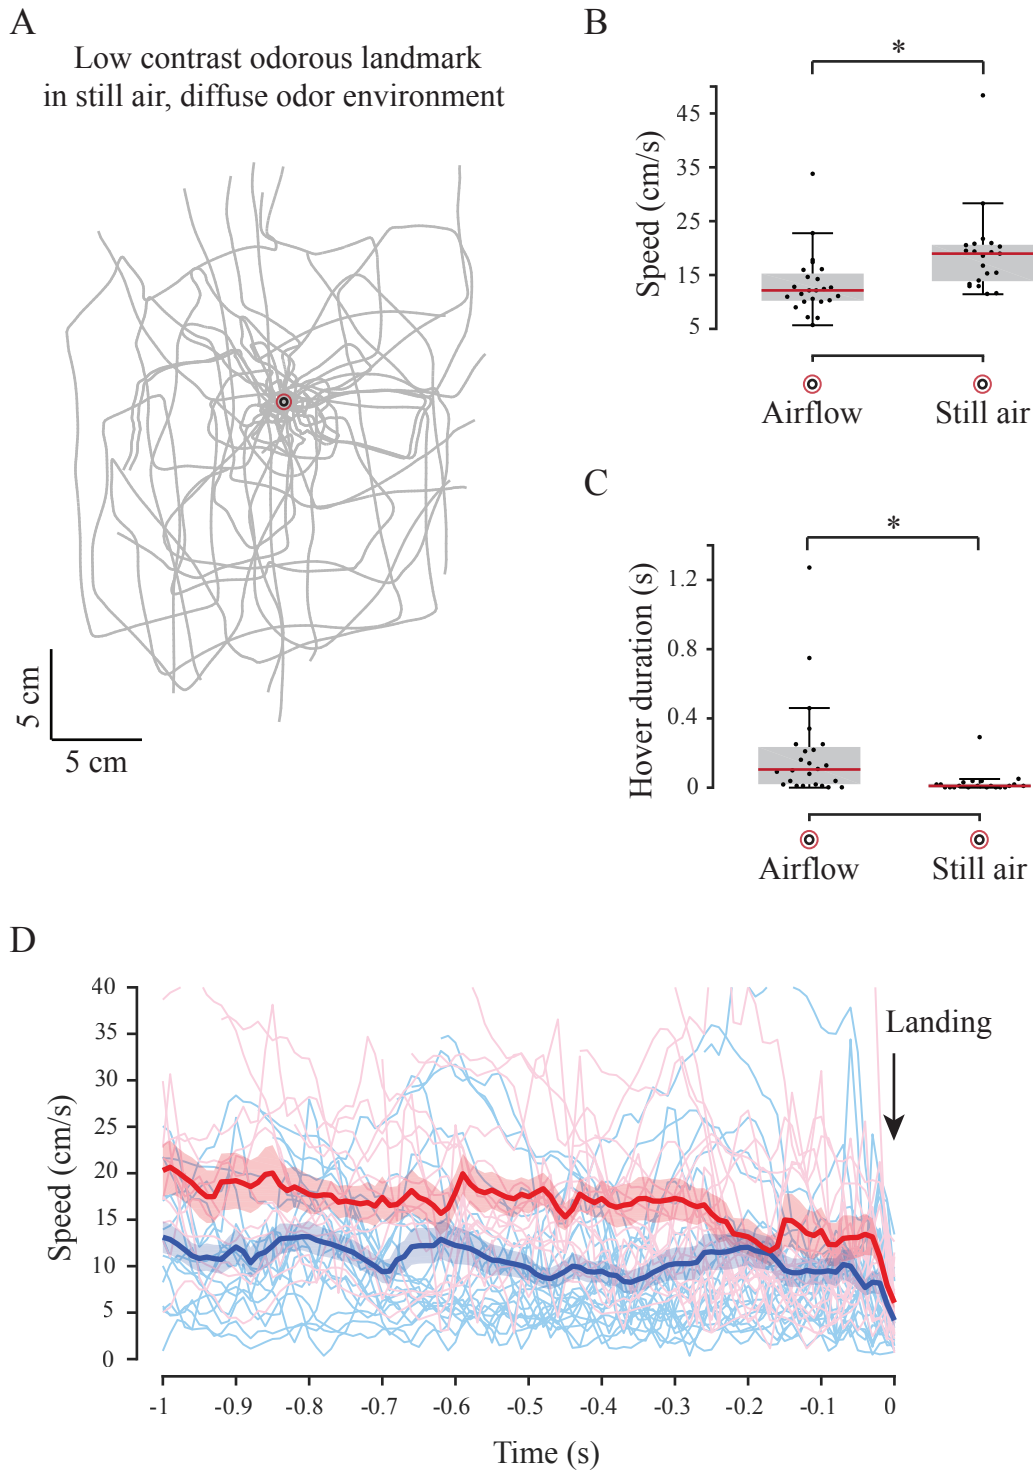

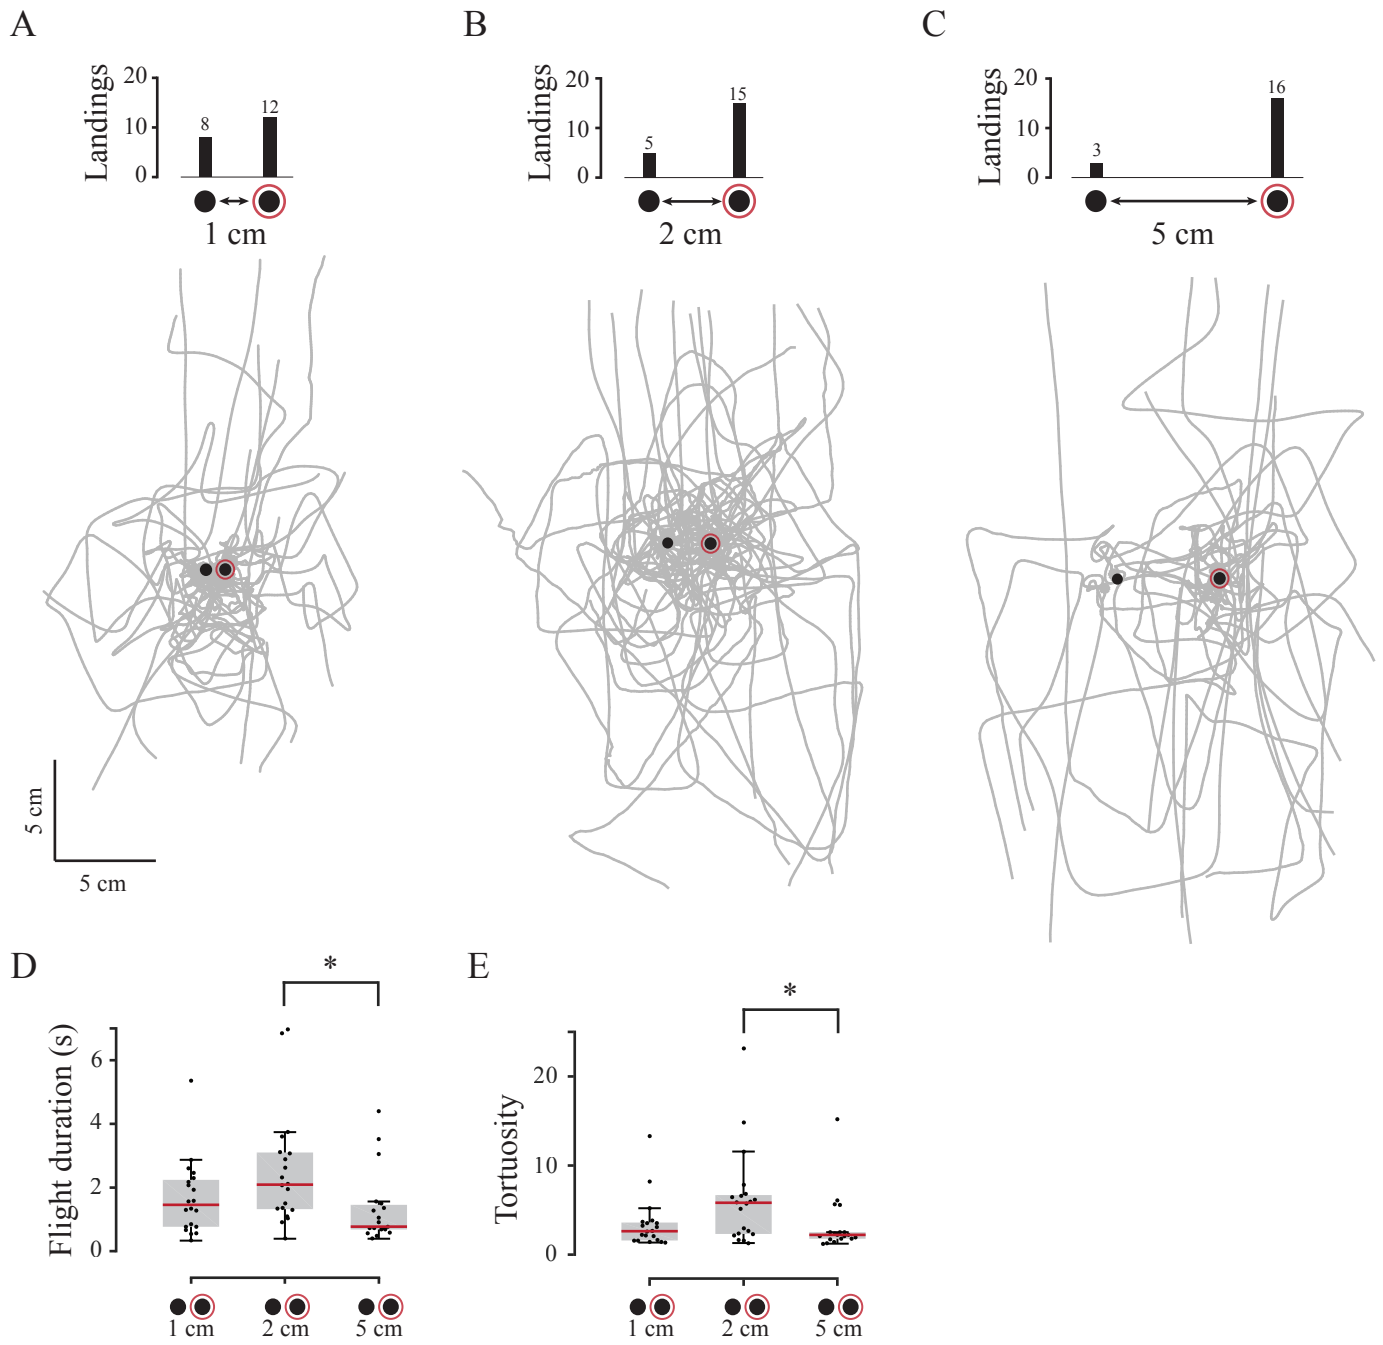

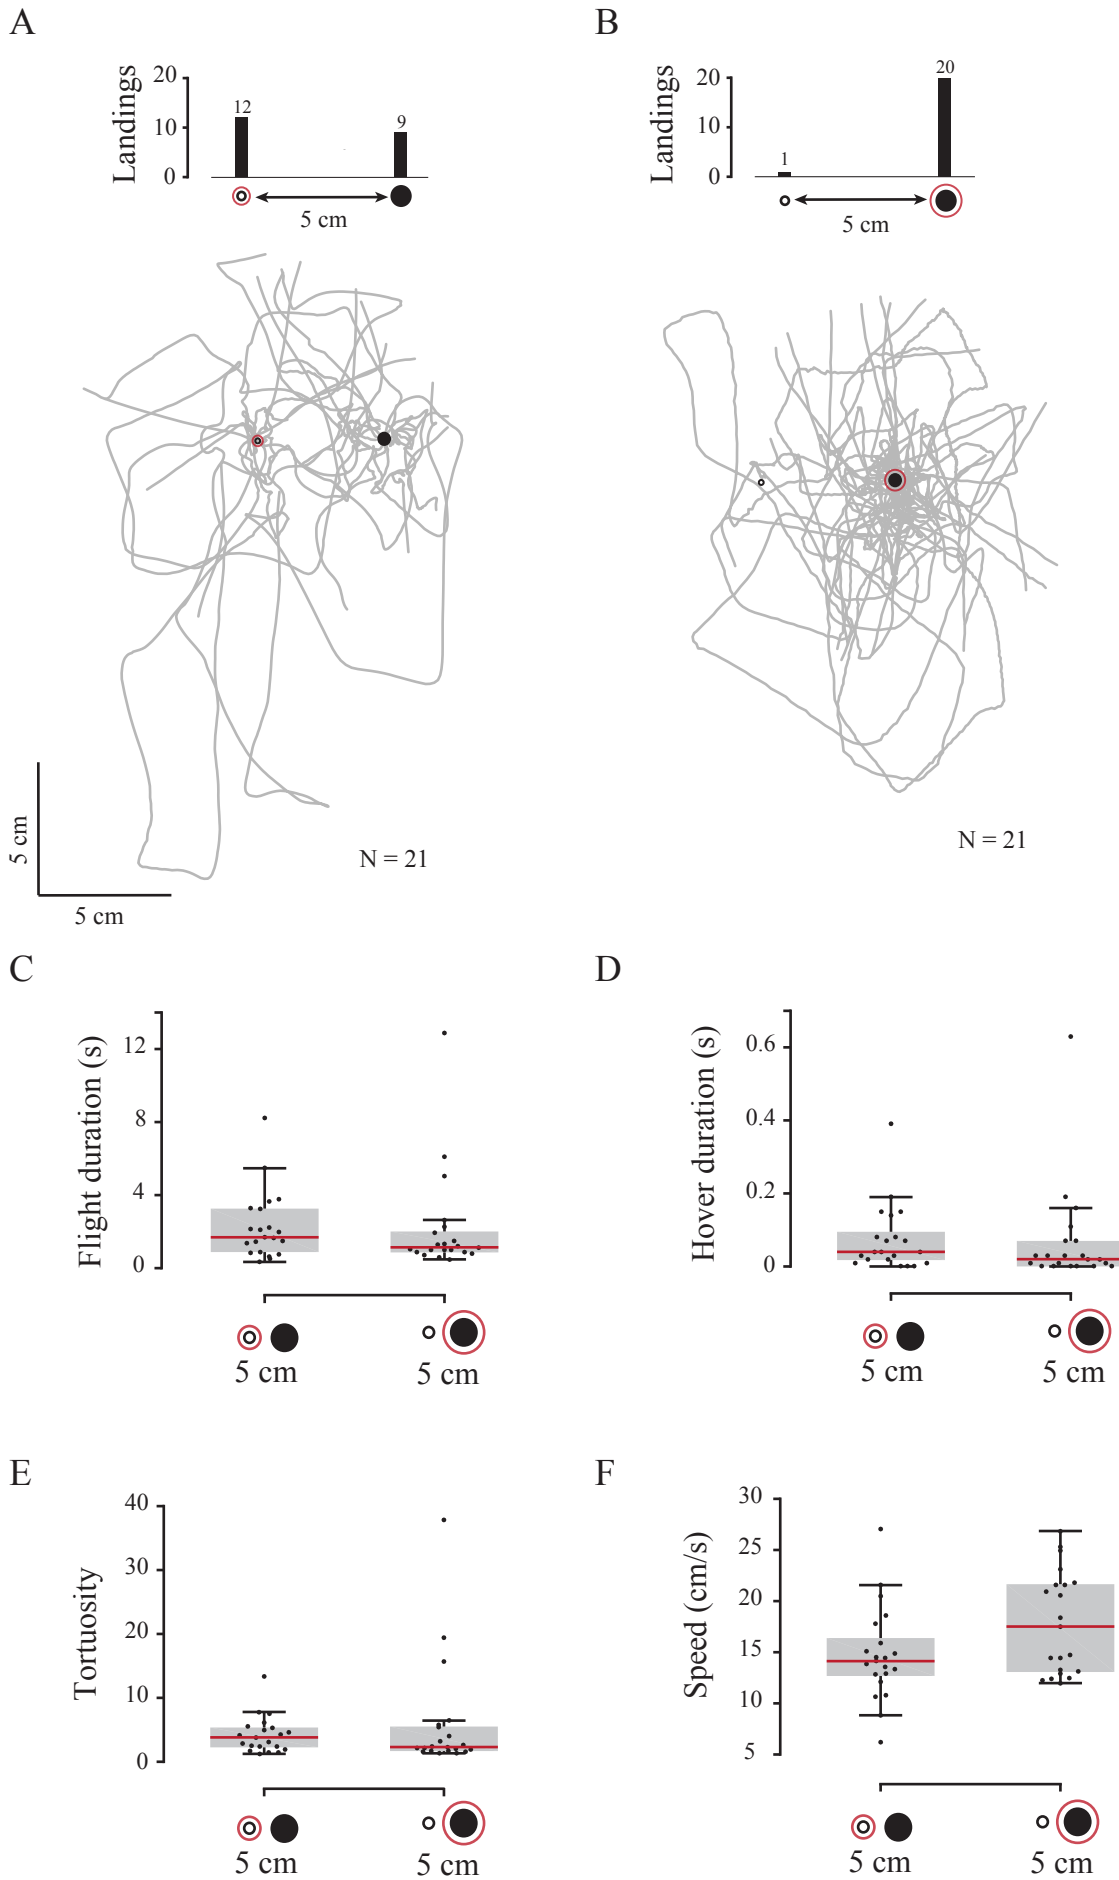

Starved Flies

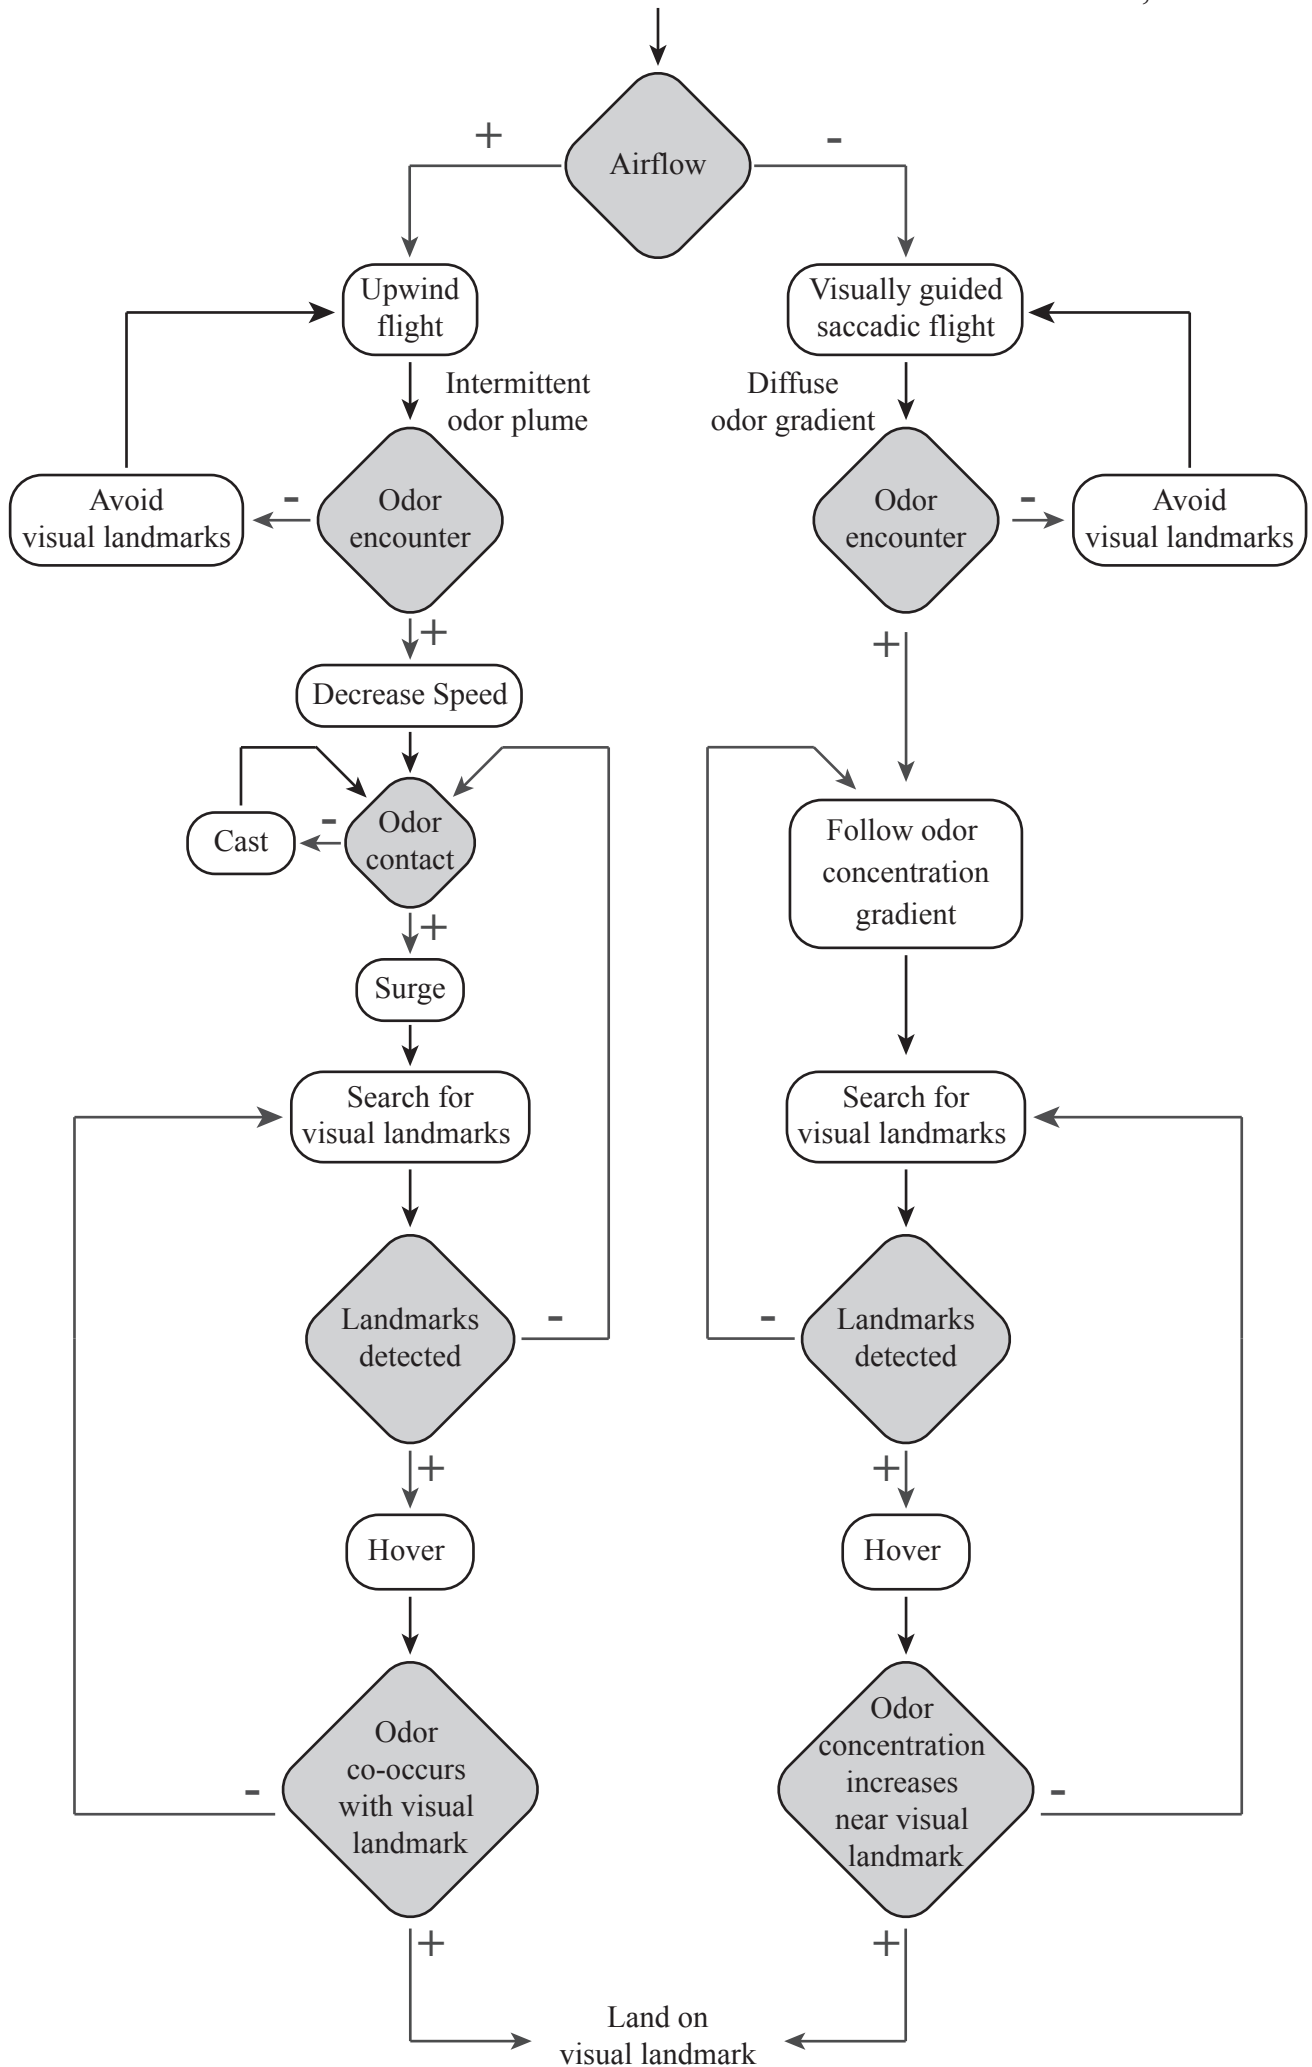

Airflow present

| Experiment | Treatment                                                                                    | % correct landings | N  | Chi-squared test (p value) |
|------------|----------------------------------------------------------------------------------------------|--------------------|----|----------------------------|
| 1          |             | —                  | 20 | —                          |
|            |             | —                  | 22 | —                          |
|            |             | —                  | 24 | —                          |
| 2          | 1 cm<br>    | 40                 | 25 | 0.32                       |
|            | 2 cm<br>    | 72                 | 25 | 0.03                       |
|            | 5 cm<br>    | 91.3               | 23 | 0.07 x 10 <sup>-3</sup>    |
| 3          | 1 cm<br>    | 95.2               | 21 | 0.03 x 10 <sup>-3</sup>    |
|            | 2 cm<br>   | 100                | 20 | 0.08 x 10 <sup>-4</sup>    |
|            | 5 cm<br>  | 100                | 20 | 0.08 x 10 <sup>-4</sup>    |
| 4          | 1 cm<br>  | 41.7               | 24 | 0.15 x 10 <sup>-2</sup>    |
|            | 3 cm<br> | 82.6               | 23 | 0.03 x 10 <sup>-4</sup>    |
|            | 3 cm<br>  | 82.8               | 29 | 0.11 x 10 <sup>-6</sup>    |

Airflow absent

|   |                                                                                             |      |    |                         |
|---|---------------------------------------------------------------------------------------------|------|----|-------------------------|
| 5 |          | —    | 21 | —                       |
| 6 | 1 cm<br> | 60   | 20 | 0.37                    |
|   | 2 cm<br> | 75   | 20 | 0.02                    |
|   | 5 cm<br> | 84.2 | 19 | 0.29 x 10 <sup>-2</sup> |
| 7 | 5 cm<br> | 57   | 21 | 0.51                    |
|   | 5 cm<br> | 95.2 | 21 | 0.34 x 10 <sup>-4</sup> |

Odorous landmarks are highlighted with red hollow circles around the landmark symbols

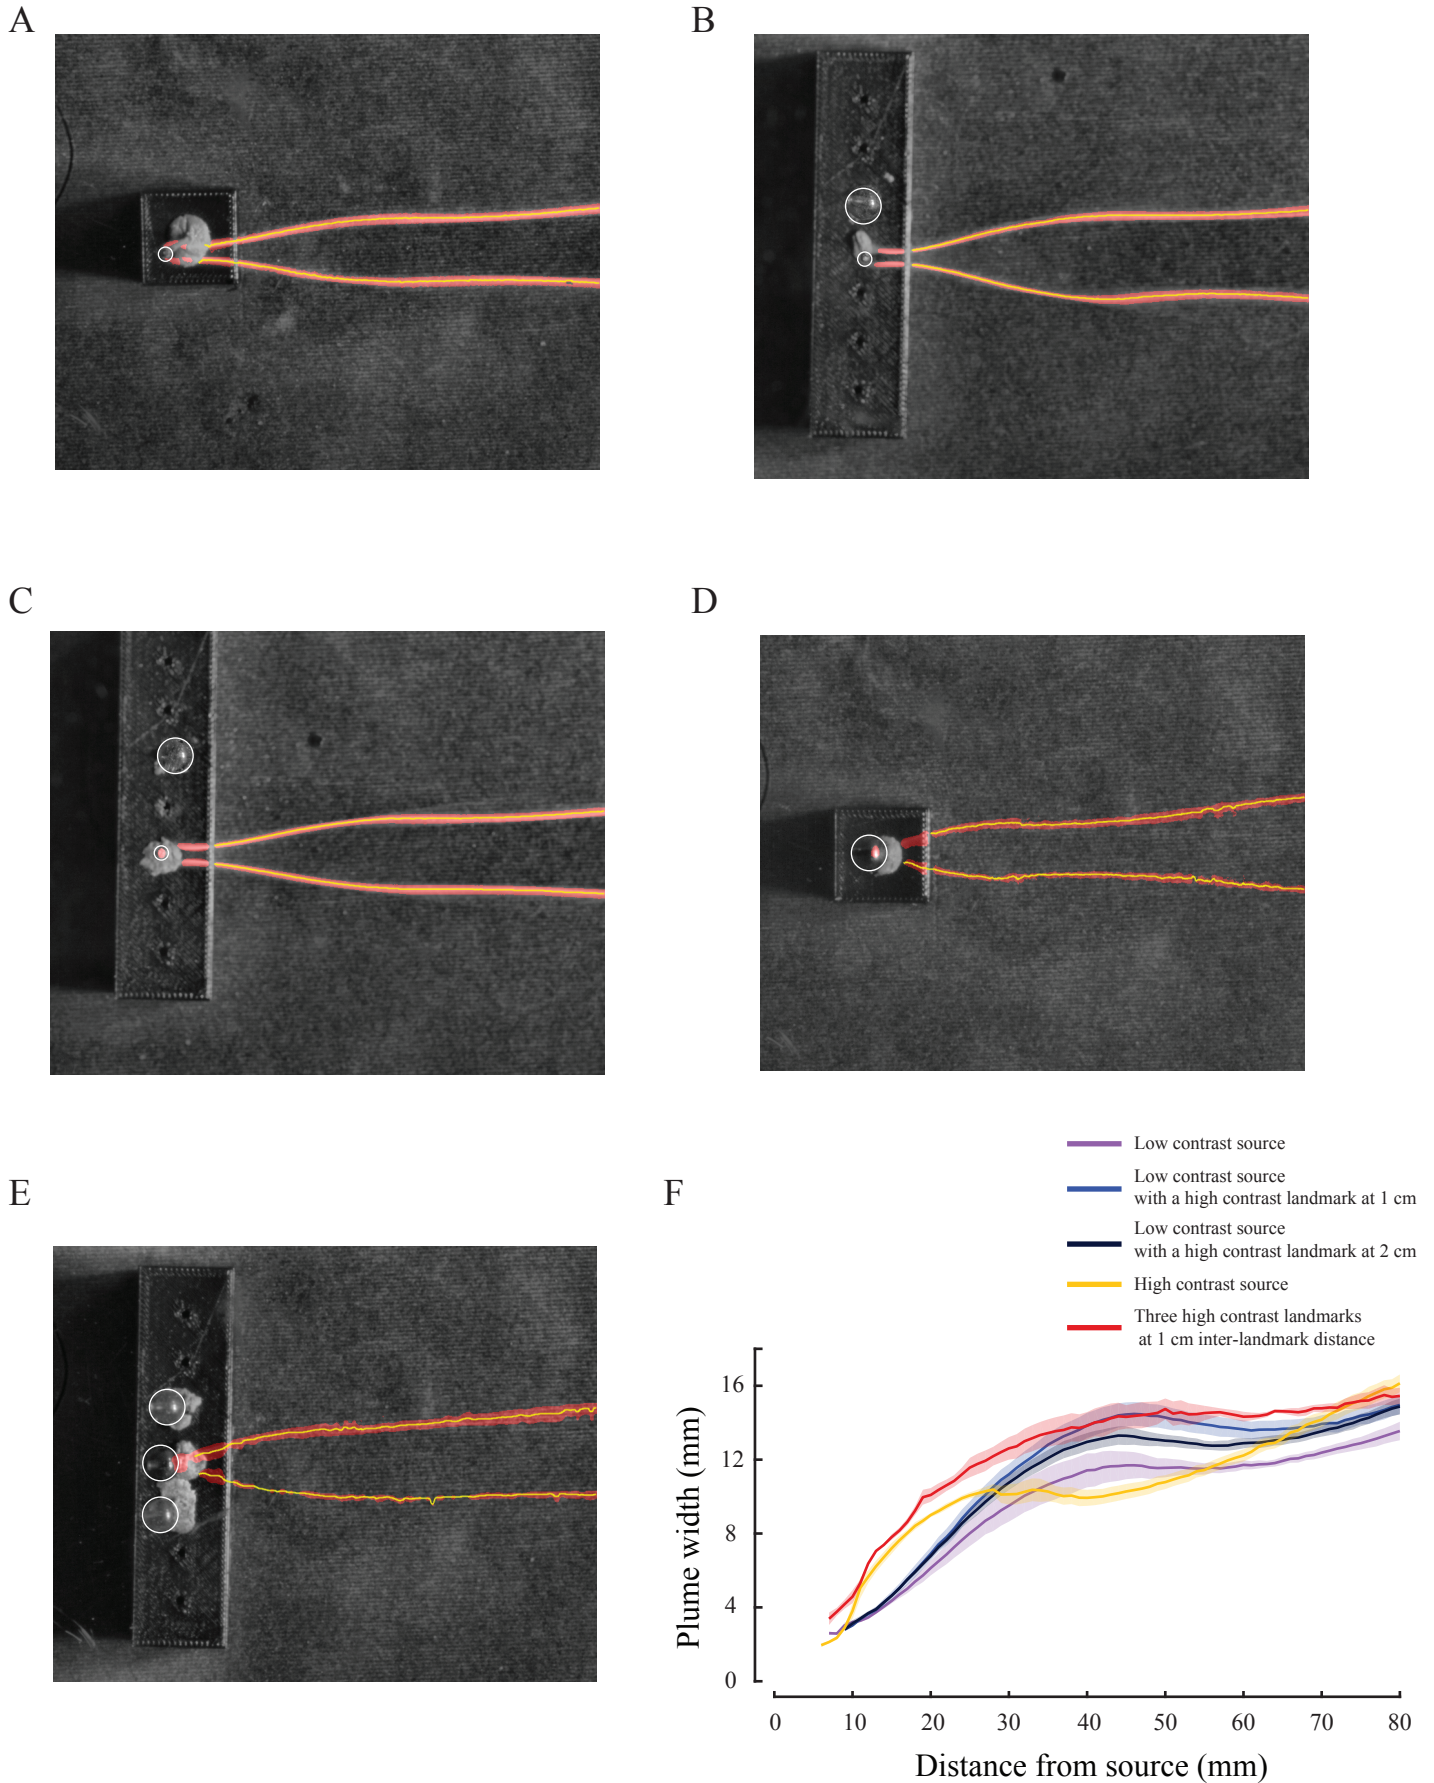



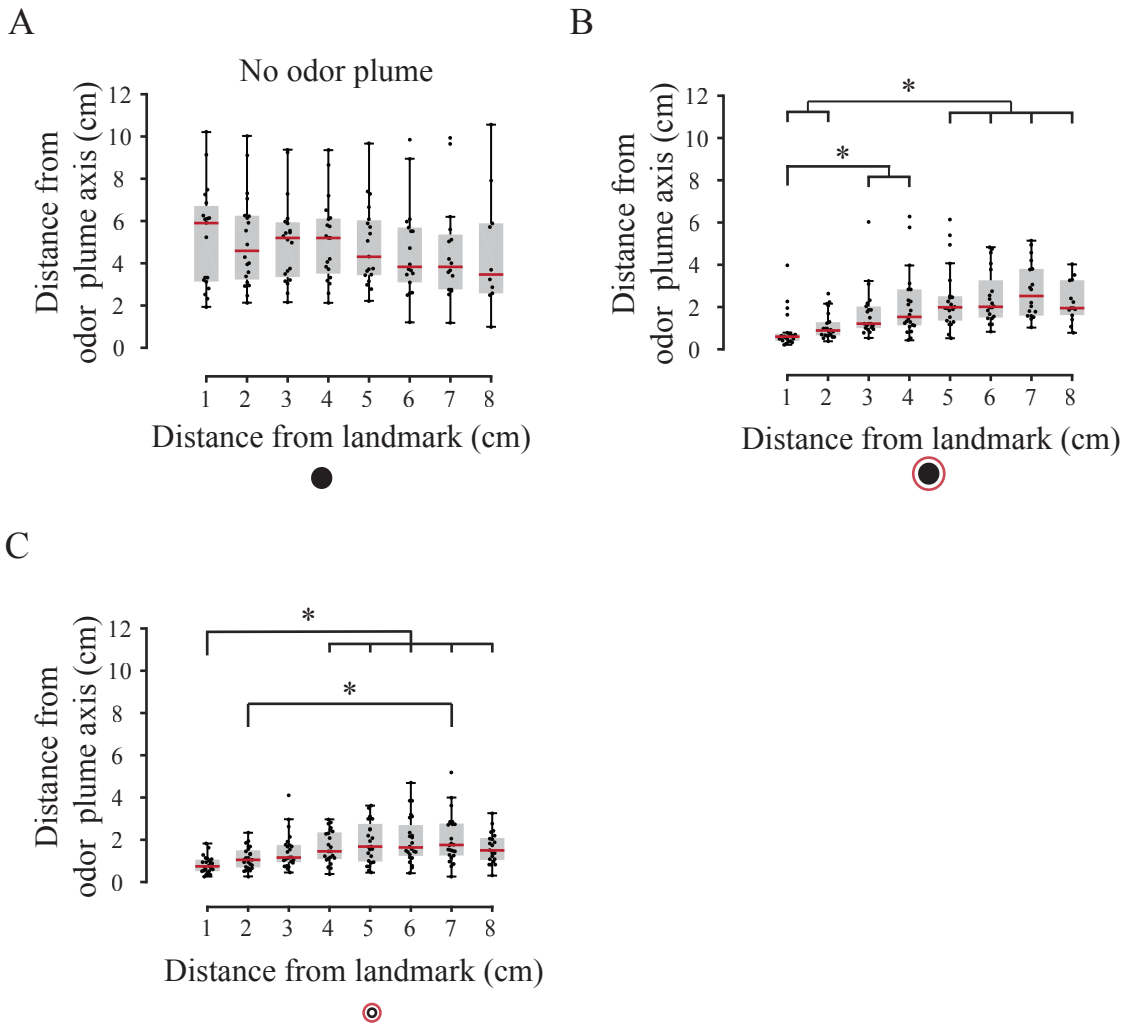

Odor on the low contrast landmark

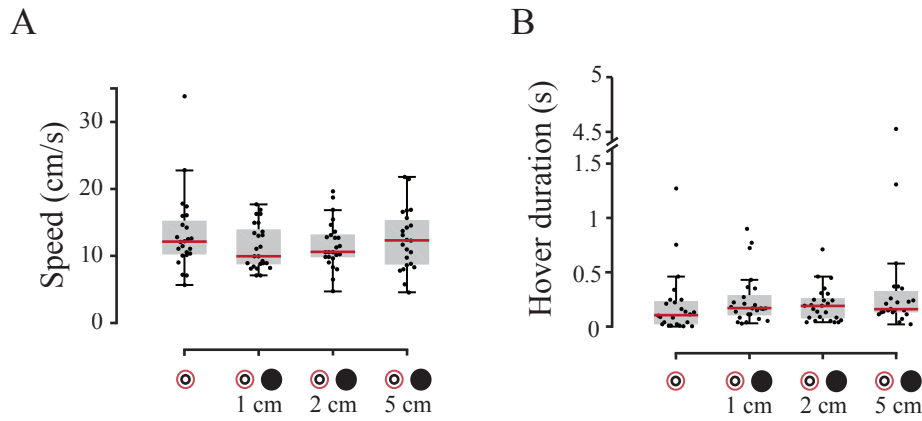

Odor on the high contrast landmark

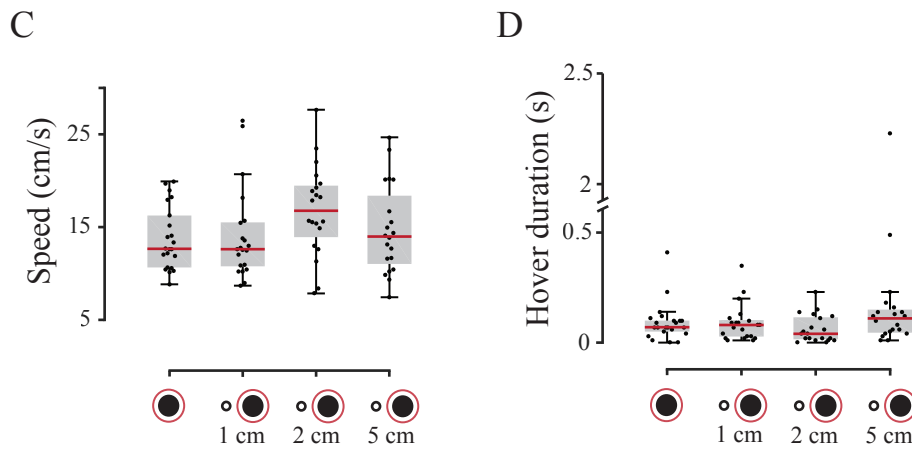

Multiple high contrast landmarks around the odor source  
(Visual clutter)

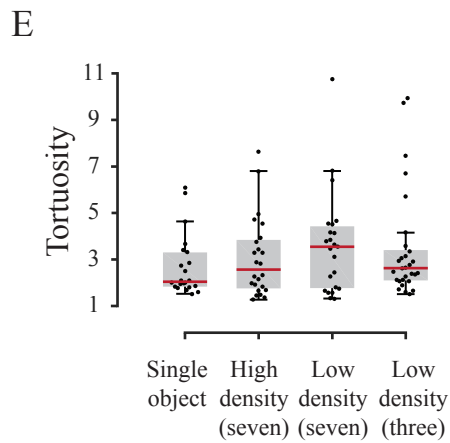

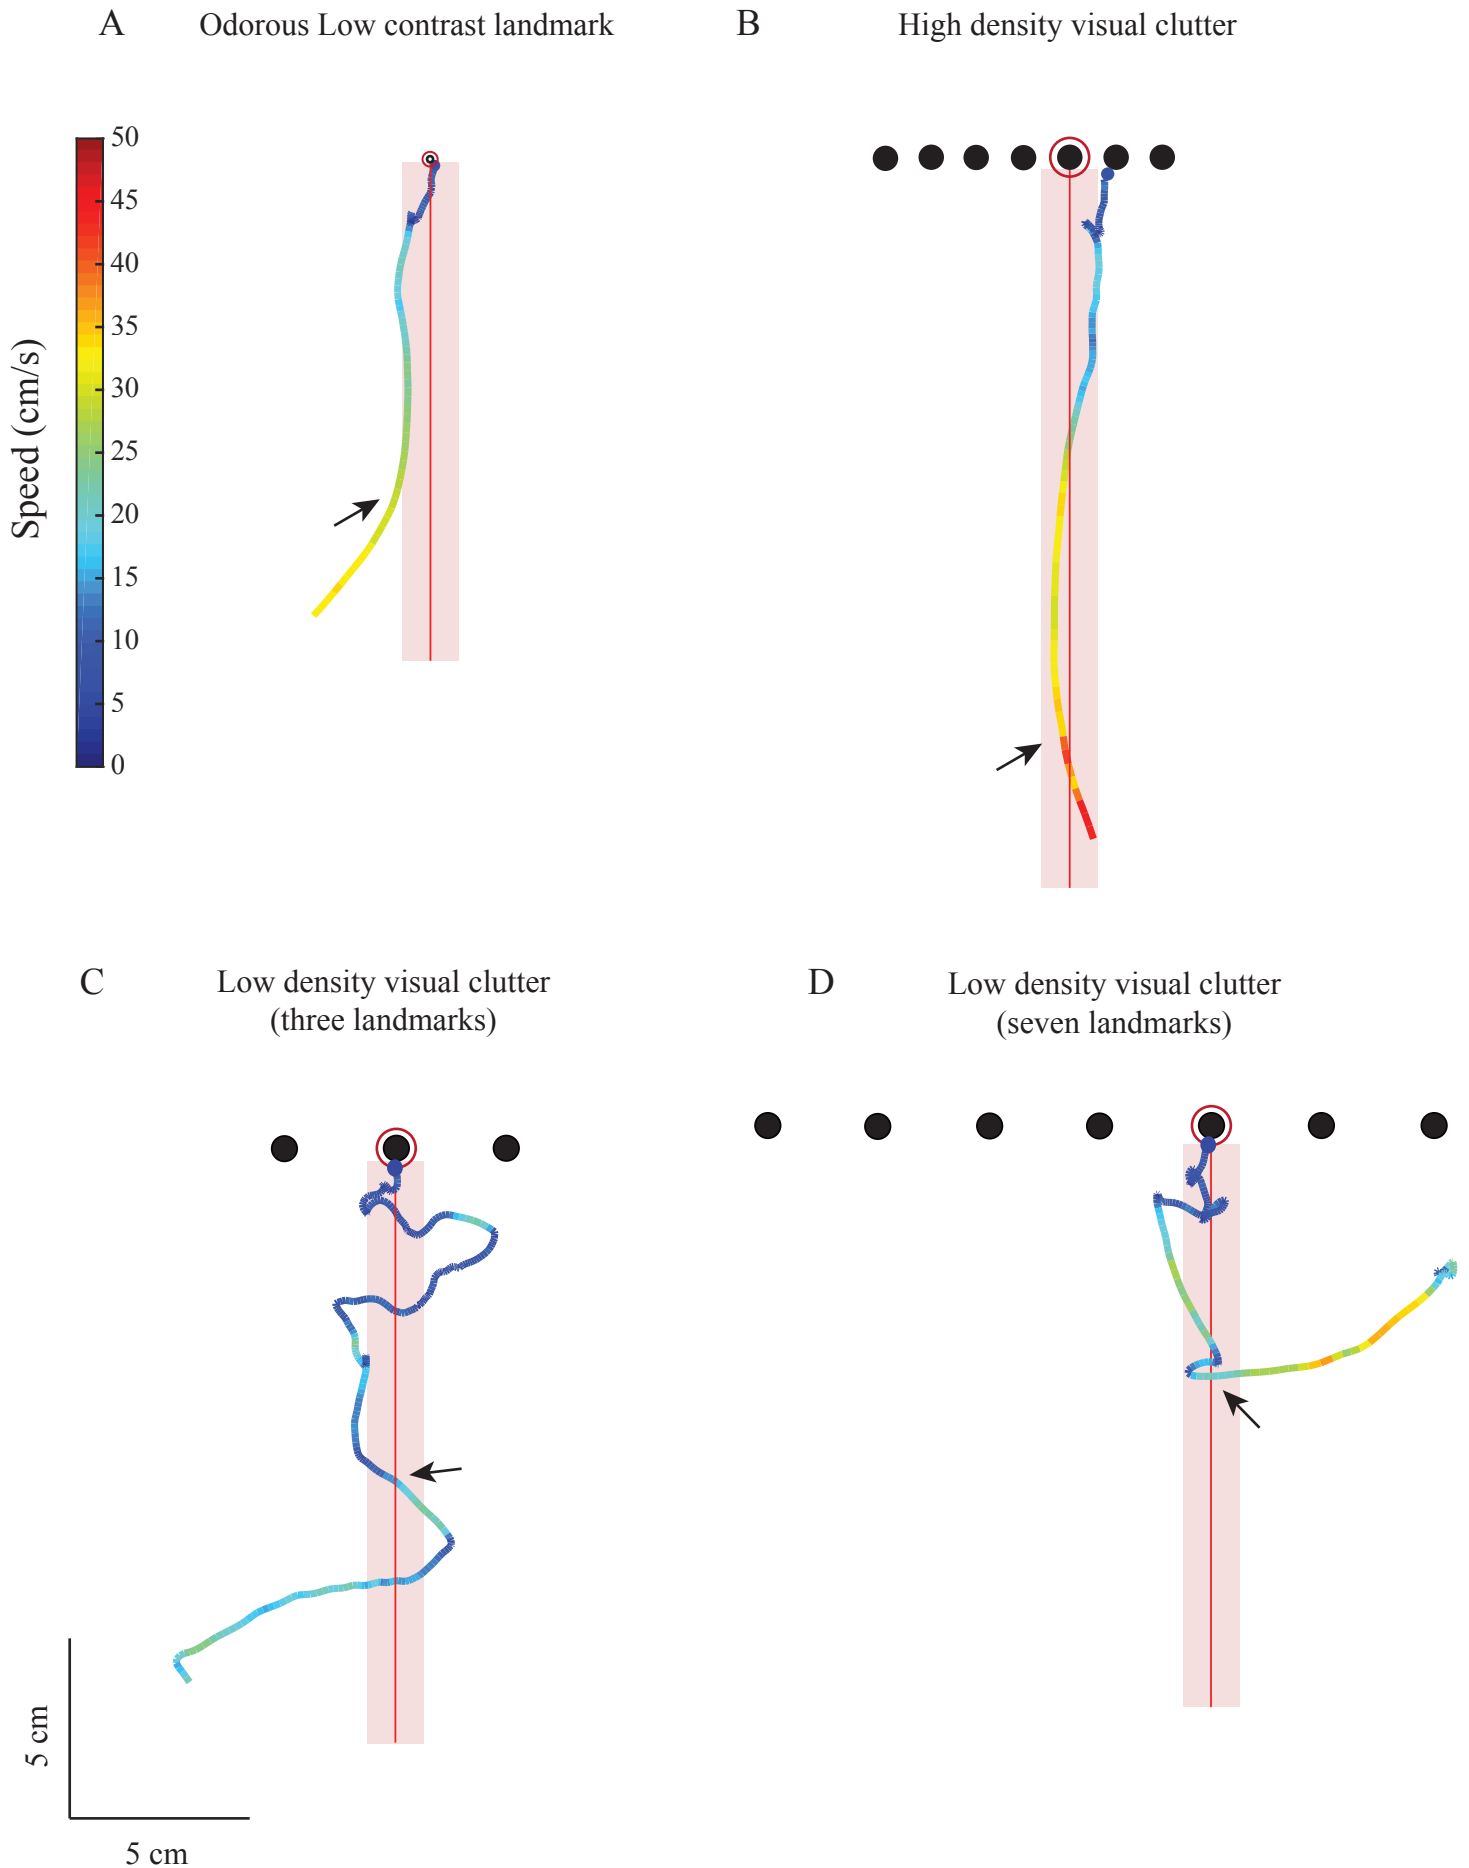

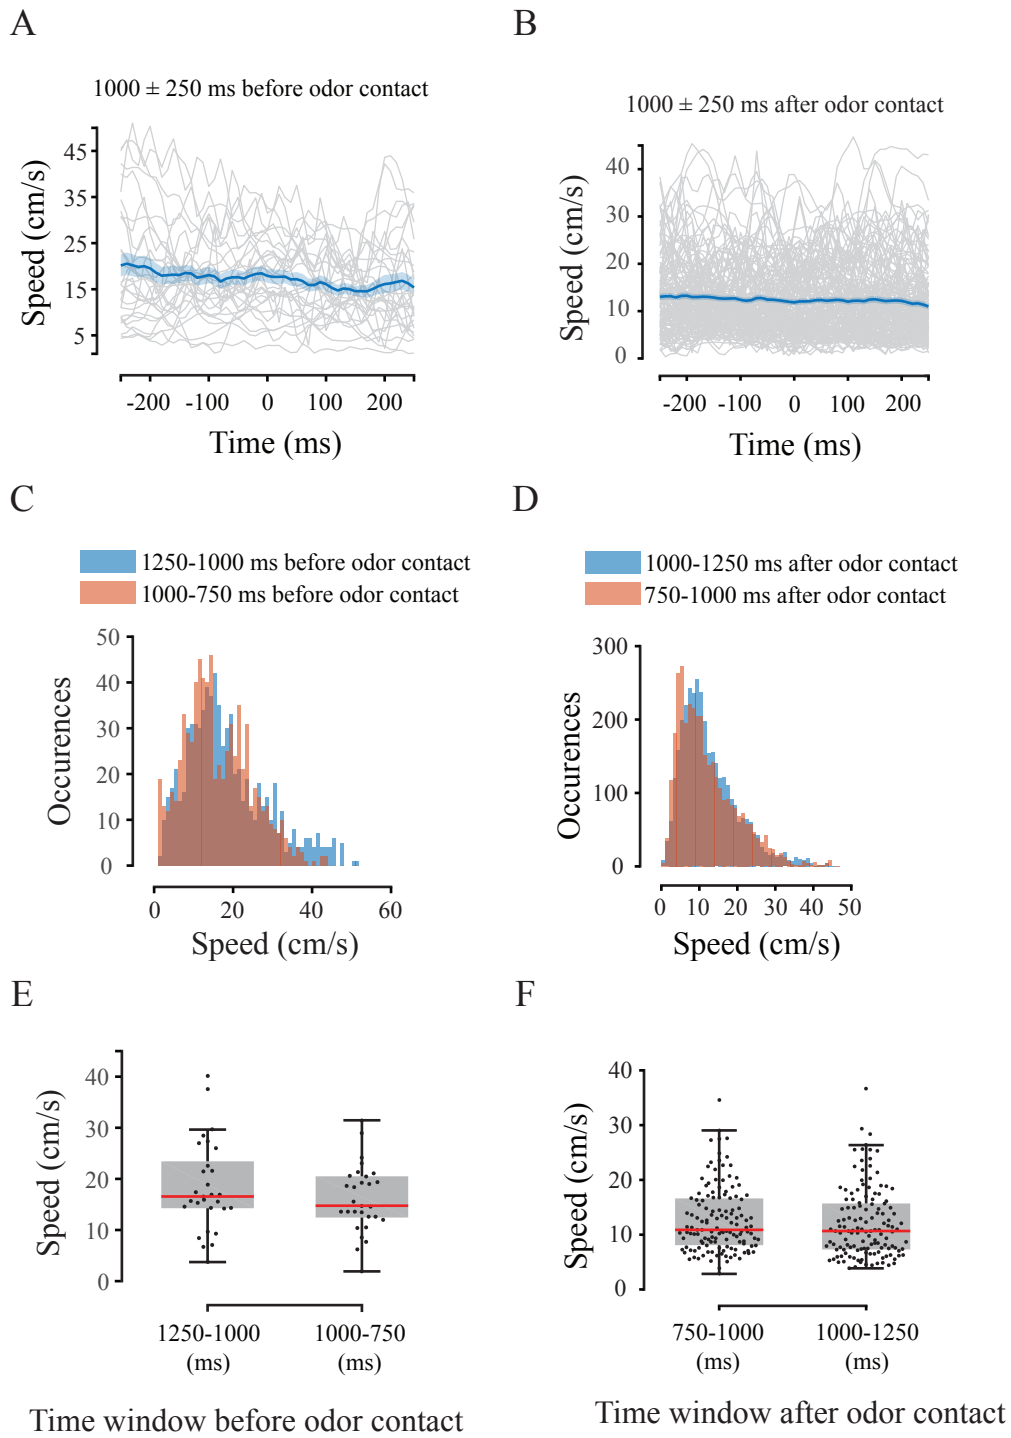

### Odor tracking in still air

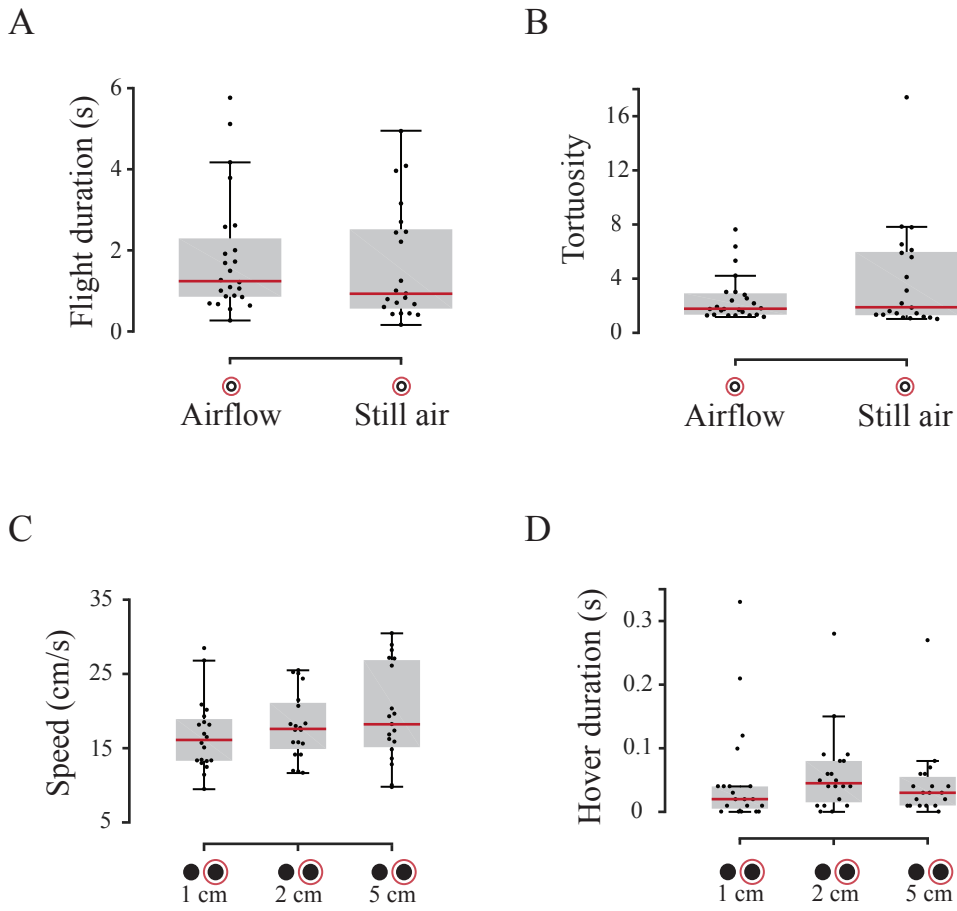

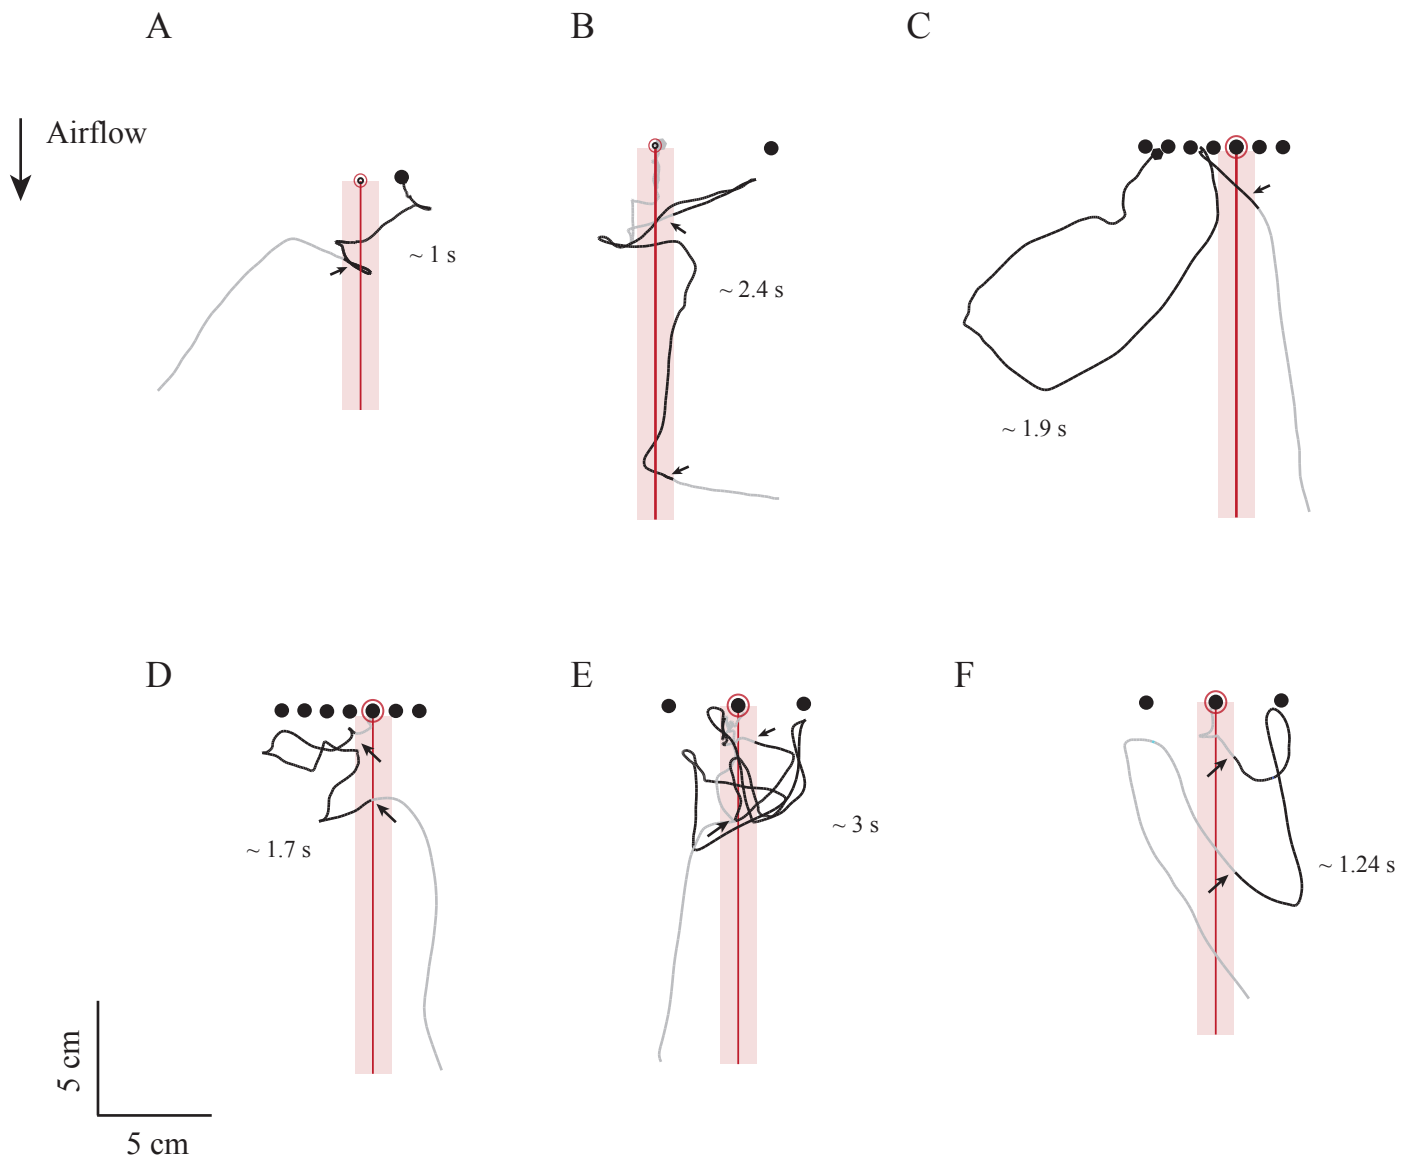

Airflow present

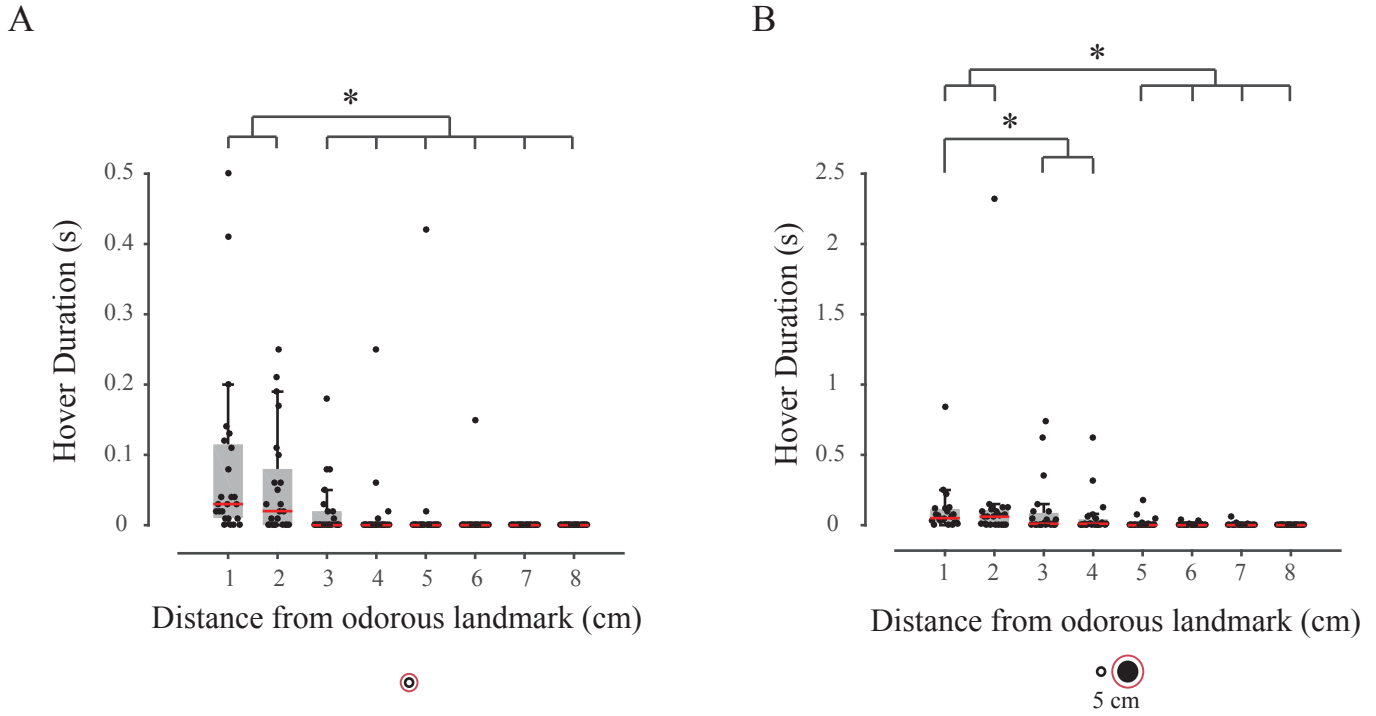

Airflow absent

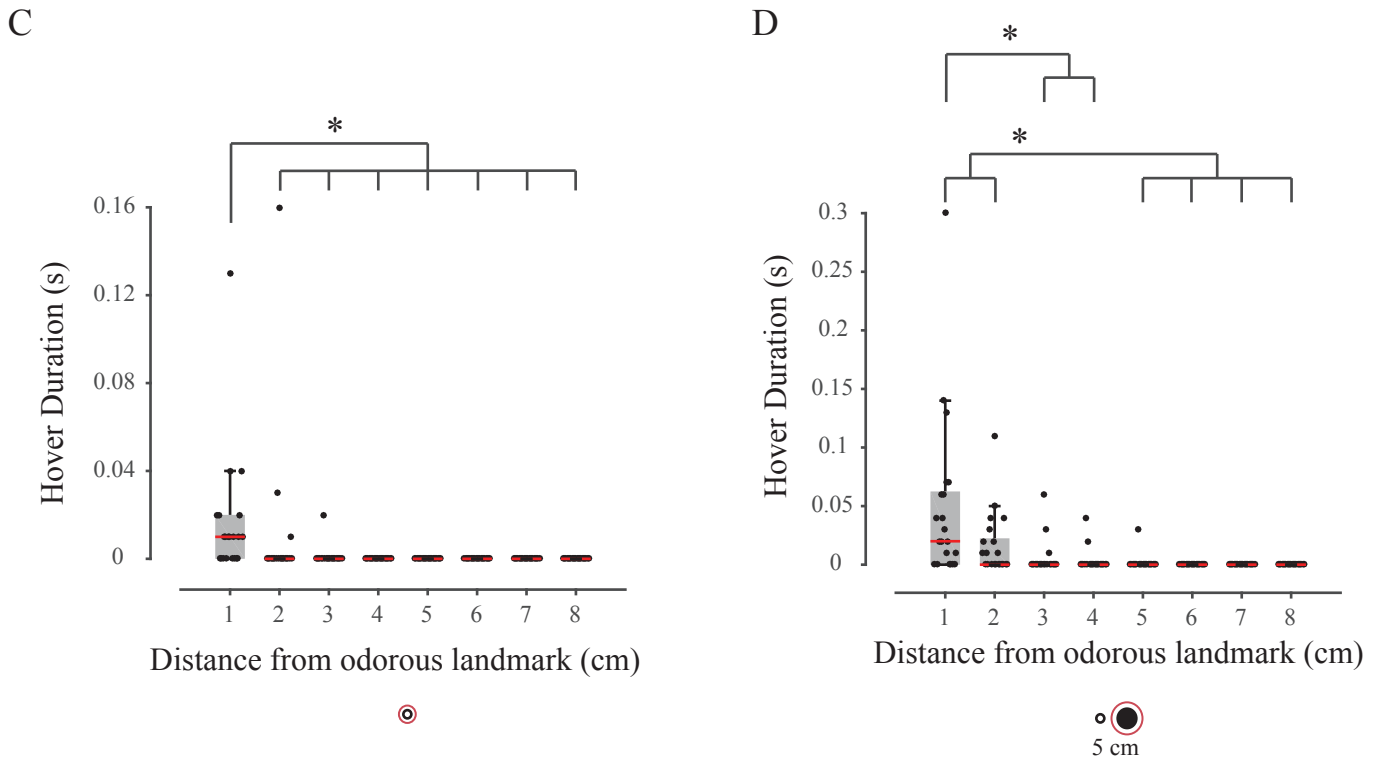

A

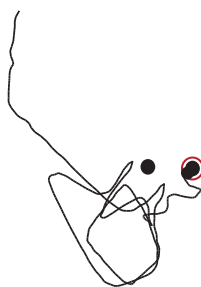

B

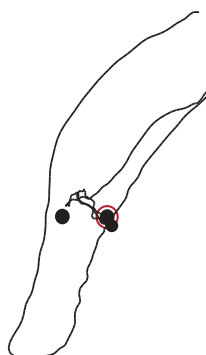

C

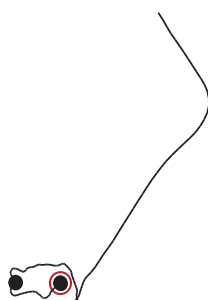

D

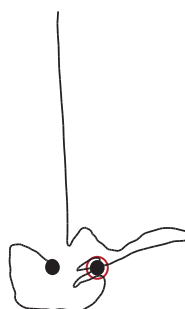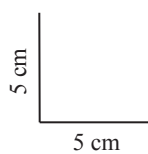

Source: http://biorxiv.org/content/10.1101/179861v1.full.pdf
